# Supplementary material for: Identification of intracellular glycosaminoglycan-interacting proteins by affinity purification mass spectrometry
Source: publisher site journal article supplement (doi:10.1515/hsz-2021-0167), 2021-09-01
Supplement: Supplementary file 1 [file j_hsz-2021-0167_suppl_002.xlsx]

## Sheet: GAG-exclusive_and_enriched_prot
			Identified interactor				Type of identification of interaction				-Log10(p-value) for enrichment				log2(EF)				mean_log2(Intensity)
SwissProt Entry	Protein names	Gene names	13sHA6	sHA3	sHA1	HE	13sHA6	sHA3	sHA1	HE	13sHA6 / Biotin	sHA3 / Biotin	sHA1 / Biotin	Heparin / Biotin	13sHA6 / Biotin	sHA3 / Biotin	sHA1 / Biotin	Heparin / Biotin	13sHA6	sHA3	sHA1	Heparin	Biotin
Q2M2I8	AP2-associated protein kinase 1	AAK1	TRUE				PD exclusive				NaN	NaN	NaN	NaN	NaN	NaN	NaN	NaN	22.616	NaN	NaN	NaN	NaN
P49588	Alanine--tRNA ligase, cytoplasmic	AARS	TRUE				enriched				2.49595	1.45734	1.097	0.656152	0.298453	0.084827	0.0540165	0.035957	29.9991	29.7855	29.7547	29.7366	29.7006
Q9NRN7	L-aminoadipate-semialdehyde dehydrogenase-phosphopantetheinyl transferase	AASDHPPT	TRUE				PD exclusive				NaN	NaN	NaN	NaN	NaN	NaN	NaN	NaN	24.7111	NaN	NaN	NaN	NaN
Q9NUJ1	Mycophenolic acid acyl-glucuronide esterase, mitochondrial	ABHD10	TRUE				PD exclusive				NaN	NaN	NaN	NaN	NaN	NaN	NaN	NaN	19.118	NaN	NaN	NaN	NaN
Q96IU4	Alpha/beta hydrolase domain-containing protein 14B	ABHD14B	TRUE				enriched				2.70346	0.182011	1.68234	0.612268	0.482669	-0.034008	0.280508	0.0896793	26.8867	26.37	26.6845	26.4937	26.404
Q8IZP0	Abl interactor 1	ABI1		TRUE				enriched			1.33399	2.06007	0.41265	0.124227	0.292689	0.322127	0.0187424	-0.0557392	24.9854	25.0149	24.7115	24.637	24.6927
P49748	Very long-chain specific acyl-CoA dehydrogenase, mitochondrial	ACADVL	TRUE				enriched				2.76063	0.810762	0.743775	0.182922	0.3723	0.0575668	0.0703651	-0.0118679	28.4292	28.1144	28.1272	28.045	28.0569
Q15067	Peroxisomal acyl-coenzyme A oxidase 1	ACOX1	TRUE	TRUE	TRUE		PD exclusive	PD exclusive	PD exclusive		NaN	NaN	NaN	NaN	NaN	NaN	NaN	NaN	23.3408	22.485	22.5457	NaN	NaN
Q96CM8	Acyl-CoA synthetase family member 2, mitochondrial	ACSF2	TRUE				PD exclusive				NaN	NaN	NaN	NaN	NaN	NaN	NaN	NaN	22.23	NaN	NaN	NaN	NaN
O43707	Alpha-actinin-4	ACTN4	TRUE				enriched				3.51077	1.38812	0.996886	0.0389961	0.328877	0.0976974	0.0925442	-0.109961	32.3836	32.1525	32.1473	31.9448	32.0548
P00813	Adenosine deaminase	ADA	TRUE	TRUE	TRUE		PD exclusive	PD exclusive	PD exclusive		NaN	NaN	NaN	NaN	NaN	NaN	NaN	NaN	20.4607	20.6531	20.5687	NaN	NaN
P35611	Alpha-adducin	ADD1				TRUE				enriched	0.0723852	0.00314753	0.0266668	2.56738	-0.0789032	-0.22815	-0.116039	0.138712	27.8125	27.6632	27.7754	28.0301	27.8914
Q9Y4W6	AFG3-like protein 2	AFG3L2	TRUE	TRUE	TRUE		PD exclusive	PD exclusive	PD exclusive		NaN	NaN	NaN	NaN	NaN	NaN	NaN	NaN	24.5344	24.7309	24.8092	NaN	NaN
O00116	Alkyldihydroxyacetonephosphate synthase, peroxisomal	AGPS			TRUE				PD exclusive		NaN	NaN	NaN	NaN	NaN	NaN	NaN	NaN	NaN	NaN	22.8958	NaN	NaN
Q09666	Neuroblast differentiation-associated protein AHNAK	AHNAK	TRUE	TRUE	TRUE		enriched	enriched	enriched		2.70321	3.74387	3.16654	0.627114	1.74822	1.14053	0.909259	0.0810066	35.1996	34.592	34.3607	33.5324	33.4514
Q8IVF2	Protein AHNAK2	AHNAK2	TRUE	TRUE	TRUE		enriched	enriched	enriched		2.42285	2.58339	3.20568	0.383286	0.938874	0.546066	0.467634	0.0198864	29.1251	28.7323	28.6538	28.2061	28.1862
P27144	Adenylate kinase 4, mitochondrial	AK4	TRUE	TRUE	TRUE		enriched	enriched	enriched		2.16953	2.16235	2.14763	0.424395	0.5256	0.393525	0.528102	0.0565334	26.8252	26.6932	26.8277	26.3562	26.2996
Q9Y2D5	A-kinase anchor protein 2	AKAP2	TRUE	TRUE			PD exclusive	PD exclusive			NaN	NaN	NaN	NaN	NaN	NaN	NaN	NaN	24.5163	23.6046	NaN	NaN	NaN
P31749	RAC-alpha serine/threonine-protein kinase	AKT1		TRUE				PD exclusive			NaN	NaN	NaN	NaN	NaN	NaN	NaN	NaN	NaN	22.6995	NaN	NaN	NaN
Q3SY69	Mitochondrial 10-formyltetrahydrofolate dehydrogenase	ALDH1L2	TRUE				enriched				3.24476	0.99318	0.773777	0.0987234	0.338279	0.0467796	0.0373287	-0.0758442	29.847	29.5555	29.546	29.4328	29.5087
P51648	Fatty aldehyde dehydrogenase	ALDH3A2	TRUE				enriched				2.4458	1.25603	1.08548	0.0991011	0.423132	0.323545	0.225549	-0.0440948	25.8078	25.7083	25.6103	25.3406	25.3847
P04075	Fructose-bisphosphate aldolase; Fructose-bisphosphate aldolase A	ALDOA		TRUE	TRUE			enriched	enriched		0.425656	2.35467	2.1872	0.701906	0.0242355	0.409121	0.363887	0.0627151	32.7385	33.1234	33.0781	32.777	32.7143
P15144	Aminopeptidase N	ANPEP	TRUE				enriched				3.09977	0.00948216	0.0445291	0.0717983	0.227134	-0.082753	-0.0593258	-0.111939	28.3583	28.0484	28.0719	28.0192	28.1312
P04083	Annexin A1; Annexin	ANXA1	TRUE				enriched				3.39119	0.7317	0.61337	0.946143	0.290781	0.0616013	0.0516991	0.046624	30.9363	30.7071	30.6972	30.6921	30.6455
P08133	Annexin A6; Annexin	ANXA6	TRUE				enriched				3.23859	0.137121	0.239169	0.125552	1.459	-0.0278168	-0.00950813	-0.0260426	32.8697	31.3828	31.4012	31.3846	31.4107
Q92572	AP-3 complex subunit sigma-1	AP3S1				TRUE				enriched	1.28524	0.203243	0.464354	2.36214	0.203398	-0.0333996	0.0739578	0.410995	24.4847	24.2479	24.3552	24.7412	24.2813
Q9BZZ5	Apoptosis inhibitor 5	API5		TRUE	TRUE			PD exclusive	PD exclusive		NaN	NaN	NaN	NaN	NaN	NaN	NaN	NaN	NaN	23.4971	23.5963	NaN	NaN
Q9HDC9	Adipocyte plasma membrane-associated protein	APMAP	TRUE				enriched				2.03037	0.42	0.274052	0.201611	0.302912	0.029768	-0.00895538	-0.0271454	26.5362	26.263	26.2243	26.2061	26.2333
Q9UKG1	DCC-interacting protein 13-alpha	APPL1	TRUE				PD exclusive				NaN	NaN	NaN	NaN	NaN	NaN	NaN	NaN	23.6413	NaN	NaN	NaN	NaN
Q96P48	Arf-GAP with Rho-GAP domain, ANK repeat and PH domain-containing protein 1	ARAP1	TRUE		TRUE		PD exclusive		PD exclusive		NaN	NaN	NaN	NaN	NaN	NaN	NaN	NaN	20.3412	NaN	20.3999	NaN	NaN
P48444	Coatomer subunit delta	ARCN1	TRUE		TRUE		enriched		enriched		2.18046	1.50315	2.4363	0.428805	0.217906	0.0763481	0.146403	0.0229347	28.8676	28.7261	28.7961	28.6727	28.6497
O75915	PRA1 family protein 3	ARL6IP5	TRUE				enriched				4.92779	1.65322	1.79806	0.918843	4.14797	1.21546	1.22598	0.301098	28.2274	25.2949	25.3054	24.3805	24.0794
O15144	Actin-related protein 2/3 complex subunit 2	ARPC2	TRUE				enriched				2.25049	0.216787	0.5196	0.113888	0.181551	-0.0207672	0.0159069	-0.0799324	30.2249	30.0226	30.0593	29.9635	30.0434
P59998	Actin-related protein 2/3 complex subunit 4	ARPC4	TRUE				enriched				2.08238	1.1044	0.356669	0.00633443	0.194534	0.0839371	0.0187893	-0.1776	28.8132	28.7027	28.6375	28.4411	28.6187
O15511	Actin-related protein 2/3 complex subunit 5	ARPC5	TRUE				enriched				2.73188	0.119896	0.487689	0.00923458	0.196468	-0.038485	0.0640244	-0.133199	27.0489	26.8139	26.9165	26.7192	26.8524
P49407	Beta-arrestin-1	ARRB1		TRUE				PD exclusive			NaN	NaN	NaN	NaN	NaN	NaN	NaN	NaN	NaN	24.4704	NaN	NaN	NaN
P15848	Arylsulfatase B	ARSB	TRUE				PD exclusive				NaN	NaN	NaN	NaN	NaN	NaN	NaN	NaN	22.3448	NaN	NaN	NaN	NaN
O00192	Armadillo repeat protein deleted in velo-cardio-facial syndrome	ARVCF	TRUE				PD exclusive				NaN	NaN	NaN	NaN	NaN	NaN	NaN	NaN	20.9734	NaN	NaN	NaN	NaN
P31939	Bifunctional purine biosynthesis protein PURH; Phosphoribosylaminoimidazolecarboxamide formyltransferase; IMP cyclohydrolase	ATIC	TRUE				enriched				2.21741	0.548675	0.400184	1.76113	0.184298	0.0186138	0.0131721	0.0898426	27.8585	27.6928	27.6874	27.764	27.6742
P05023	Sodium/potassium-transporting ATPase subunit alpha-1	ATP1A1	TRUE				enriched				3.43935	0.117515	0.0442773	0.120944	0.235019	-0.0568233	-0.0606297	-0.0631821	29.3963	29.1045	29.1007	29.0981	29.1613
P05026	Sodium/potassium-transporting ATPase subunit beta-1	ATP1B1	TRUE		TRUE		PD exclusive		PD exclusive		NaN	NaN	NaN	NaN	NaN	NaN	NaN	NaN	24.7041	NaN	22.9935	NaN	NaN
P54709	Sodium/potassium-transporting ATPase subunit beta-3	ATP1B3	TRUE				enriched				2.59813	0.664916	0.300155	0.423929	1.11871	0.0384323	-0.000351715	0.0431732	26.0058	24.9256	24.8868	24.9303	24.8871
P16615; O14983; Q93084	Sarcoplasmic/endoplasmic reticulum calcium ATPase 2; Sarcoplasmic/endoplasmic reticulum calcium ATPase 1; Sarcoplasmic/endoplasmic reticulum calcium ATPase 3	ATP2A2; ATP2A1; ATP2A3	TRUE				enriched				2.33887	1.40099	0.362632	0.935053	0.467926	0.130108	0.0183411	0.0699585	26.3174	25.9796	25.8678	25.9194	25.8495
P23634	Plasma membrane calcium-transporting ATPase 4	ATP2B4	TRUE		TRUE		enriched		enriched		3.1179	1.9491	2.15846	0.846845	0.528843	0.208559	0.260245	0.0767681	29.3693	29.049	29.1007	28.9172	28.8404
P24539	ATP synthase F(0) complex subunit B1, mitochondrial	ATP5F1	TRUE				enriched				2.93325	0.450452	0.767315	0.0837101	0.578142	0.0565441	0.120291	-0.144669	27.7764	27.2548	27.3186	27.0536	27.1983
P05496; Q06055; P48201	ATP synthase F(0) complex subunit C1, mitochondrial; ATP synthase F(0) complex subunit C2, mitochondrial; ATP synthase F(0) complex subunit C3, mitochondrial	ATP5G1; ATP5G2; ATP5G3	TRUE		TRUE		PD exclusive		PD exclusive		NaN	NaN	NaN	NaN	NaN	NaN	NaN	NaN	25.5222	NaN	25.6002	NaN	NaN
P56385	ATP synthase subunit e, mitochondrial	ATP5I	TRUE	TRUE			PD exclusive	PD exclusive			NaN	NaN	NaN	NaN	NaN	NaN	NaN	NaN	25.3772	25.1032	NaN	NaN	NaN
O75964	ATP synthase subunit g, mitochondrial	ATP5L	TRUE				enriched				2.57436	0.66366	0.558316	0.388382	0.420896	0.082193	0.0236279	0.0164196	26.6896	26.3509	26.2924	26.2852	26.2688
P38606	V-type proton ATPase catalytic subunit A	ATP6V1A	TRUE				enriched				2.68852	1.06204	1.46577	0.150185	0.448375	0.105701	0.152411	-0.0877571	28.0414	27.6987	27.7454	27.5052	27.593
Q9UII2	ATPase inhibitor, mitochondrial	ATPIF1	TRUE				PD exclusive				NaN	NaN	NaN	NaN	NaN	NaN	NaN	NaN	27.4443	NaN	NaN	NaN	NaN
Q8WWM7	Ataxin-2-like protein	ATXN2L	TRUE				PD exclusive				NaN	NaN	NaN	NaN	NaN	NaN	NaN	NaN	24.6423	NaN	NaN	NaN	NaN
P51572	B-cell receptor-associated protein 31	BCAP31	TRUE	TRUE	TRUE		PD exclusive	PD exclusive	PD exclusive		NaN	NaN	NaN	NaN	NaN	NaN	NaN	NaN	28.1663	26.2713	26.1707	NaN	NaN
O00499	Myc box-dependent-interacting protein 1	BIN1	TRUE				PD exclusive				NaN	NaN	NaN	NaN	NaN	NaN	NaN	NaN	24.6354	NaN	NaN	NaN	NaN
P07738	Bisphosphoglycerate mutase	BPGM	TRUE				enriched				2.24228	1.28734	1.74011	0.149002	0.390258	0.182434	0.282051	-0.118958	27.5997	27.3919	27.4915	27.0905	27.2095
Q5VW32	BRO1 domain-containing protein BROX	BROX	TRUE				PD exclusive				NaN	NaN	NaN	NaN	NaN	NaN	NaN	NaN	22.8833	NaN	NaN	NaN	NaN
Q9Y6E2	Basic leucine zipper and W2 domain-containing protein 2	BZW2	TRUE				PD exclusive				NaN	NaN	NaN	NaN	NaN	NaN	NaN	NaN	23.4154	NaN	NaN	NaN	NaN
Q7Z3J2	UPF0505 protein C16orf62	C16orf62	TRUE	TRUE			PD exclusive	PD exclusive			NaN	NaN	NaN	NaN	NaN	NaN	NaN	NaN	20.9592	20.9243	NaN	NaN	NaN
Q9HB71	Calcyclin-binding protein	CACYBP		TRUE				enriched			1.75736	2.1325	0.699565	0.8765	3.3726	0.351882	0.672184	0.301429	28.9827	26.9825	26.2823	26.9321	25.6101
Q86VP6; O75155	Cullin-associated NEDD8-dissociated protein 1; Cullin-associated NEDD8-dissociated protein 2	CAND1; CAND2	TRUE				enriched				2.38308	0.000546549	0.00746057	0.0842193	0.23329	-0.105	-0.0743847	-0.0494858	28.7392	28.401	28.4316	28.4565	28.506
Q01518	Adenylyl cyclase-associated protein 1	CAP1	TRUE	TRUE	TRUE		enriched	enriched	enriched		2.52083	3.30059	2.66661	1.25256	0.7059	0.59526	0.44281	0.226716	32.626	32.5154	32.3629	32.1468	31.9201
P40123	Adenylyl cyclase-associated protein 2; Adenylyl cyclase-associated protein	CAP2	TRUE		TRUE		enriched		enriched		3.3531	0.824362	2.32756	0.937936	0.976546	0.0754616	0.140963	0.0908699	27.6886	26.7875	26.853	26.8029	26.712
P07384	Calpain-1 catalytic subunit	CAPN1	TRUE				enriched				2.06857	0.0652342	0.0233112	0.0116054	0.175447	-0.109024	-0.0786102	-0.240784	28.5612	28.2767	28.3072	28.145	28.3858
P47756	F-actin-capping protein subunit beta	CAPZB	TRUE				enriched				2.708	0.43943	0.356681	0.218338	0.184051	0.0241726	0.00688133	-0.0260811	29.4598	29.2999	29.2826	29.2496	29.2757
P49589	Cysteine--tRNA ligase, cytoplasmic	CARS	TRUE				enriched				2.3584	0.368803	0.821491	0.805938	0.312091	0.0136627	0.0649399	0.0757378	28.7373	28.4388	28.4901	28.5009	28.4252
Q9HA77	Probable cysteine--tRNA ligase, mitochondrial	CARS2	TRUE				PD exclusive				NaN	NaN	NaN	NaN	NaN	NaN	NaN	NaN	22.9725	NaN	NaN	NaN	NaN
P51636	Caveolin; Caveolin-2	CAV2	TRUE				PD exclusive				NaN	NaN	NaN	NaN	NaN	NaN	NaN	NaN	23.8643	NaN	NaN	NaN	NaN
Q16204	Coiled-coil domain-containing protein 6	CCDC6	TRUE	TRUE	TRUE	TRUE	PD exclusive	PD exclusive	PD exclusive	PD exclusive	NaN	NaN	NaN	NaN	NaN	NaN	NaN	NaN	27.6332	24.8773	24.3575	23.7684	NaN
P78371	T-complex protein 1 subunit beta	CCT2		TRUE				enriched			0.71968	2.33234	0.580358	0.320848	0.0720081	0.093092	0.0374767	0.00456123	29.3025	29.3235	29.2679	29.235	29.2304
P49368	T-complex protein 1 subunit gamma	CCT3	TRUE				enriched				4.81369	1.26833	1.25207	0.270927	0.465942	0.189944	0.149917	-0.00756378	30.7943	30.5183	30.4782	30.3208	30.3283
P50991	T-complex protein 1 subunit delta	CCT4	TRUE				enriched				3.10223	0.942188	1.09825	0.443907	0.410497	0.106792	0.0742451	0.0234627	29.3222	29.0185	28.986	28.9352	28.9117
P48643	T-complex protein 1 subunit epsilon	CCT5	TRUE				enriched				2.09974	0.114689	0.310666	0.0257358	0.166475	-0.0431458	0.00113525	-0.161544	28.692	28.4824	28.5267	28.364	28.5255
P40227; Q92526	T-complex protein 1 subunit zeta; T-complex protein 1 subunit zeta-2	CCT6A; CCT6B	TRUE				enriched				3.22844	0.757865	1.92866	0.227577	0.393946	0.0577084	0.123507	-0.0182907	29.143	28.8068	28.8726	28.7308	28.7491
P50990	T-complex protein 1 subunit theta	CCT8	TRUE				enriched				3.7327	1.1139	1.13821	0.205157	0.390657	0.100179	0.128445	-0.035067	28.8719	28.5814	28.6097	28.4462	28.4812
Q9HCU0	Endosialin	CD248			TRUE				PD exclusive		NaN	NaN	NaN	NaN	NaN	NaN	NaN	NaN	NaN	NaN	23.2578	NaN	NaN
Q96G23	Ceramide synthase 2	CERS2	TRUE		TRUE		PD exclusive		PD exclusive		NaN	NaN	NaN	NaN	NaN	NaN	NaN	NaN	26.2244	NaN	25.4083	NaN	NaN
Q9P2M7	Cingulin	CGN	TRUE	TRUE			PD exclusive	PD exclusive			NaN	NaN	NaN	NaN	NaN	NaN	NaN	NaN	26.6502	26.8412	NaN	NaN	NaN
Q9HD42	Charged multivesicular body protein 1a	CHMP1A	TRUE				PD exclusive				NaN	NaN	NaN	NaN	NaN	NaN	NaN	NaN	25.5638	NaN	NaN	NaN	NaN
O43633	Charged multivesicular body protein 2a	CHMP2A	TRUE				enriched				2.89973	0.446461	1.06223	NaN	2.32105	0.157732	0.507553	0	27.0144	25.1434	25.4933	NaN	24.6934
Q9UHD1	Cysteine and histidine-rich domain-containing protein 1	CHORDC1	TRUE	TRUE			PD exclusive	PD exclusive			NaN	NaN	NaN	NaN	NaN	NaN	NaN	NaN	24.9045	24.982	NaN	NaN	NaN
Q14011	Cold-inducible RNA-binding protein	CIRBP	TRUE				PD exclusive				NaN	NaN	NaN	NaN	NaN	NaN	NaN	NaN	22.8817	NaN	NaN	NaN	NaN
Q8N5K1	CDGSH iron-sulfur domain-containing protein 2	CISD2	TRUE	TRUE	TRUE	TRUE	PD exclusive	PD exclusive	PD exclusive	PD exclusive	NaN	NaN	NaN	NaN	NaN	NaN	NaN	NaN	25.8176	25.0705	24.8003	24.1883	NaN
P30085	UMP-CMP kinase	CMPK1	TRUE				enriched				2.48456	0.255662	0.456113	0.191727	0.170356	-0.0158306	0.0279171	-0.0291992	27.2357	27.0495	27.0933	27.0361	27.0653
Q96F85	CB1 cannabinoid receptor-interacting protein 1	CNRIP1	TRUE				PD exclusive				NaN	NaN	NaN	NaN	NaN	NaN	NaN	NaN	24.4565	NaN	NaN	NaN	NaN
Q99715	Collagen alpha-1(XII) chain	COL12A1		TRUE				enriched			0.000122441	2.03256	1.17301	0.0498145	-0.514727	0.194672	0.0892052	-0.107219	28.5838	29.2932	29.1877	28.9913	29.0985
P02452	Collagen alpha-1(I) chain	COL1A1	TRUE	TRUE	TRUE		enriched	enriched	enriched		2.95773	3.6534	3.29804	0.0298495	1.09454	1.90738	1.62588	-0.238147	31.5422	32.3551	32.0736	30.2095	30.4477
P08123	Collagen alpha-2(I) chain	COL1A2	TRUE	TRUE	TRUE		enriched	enriched	enriched		3.27147	3.34232	2.96148	0.0282001	1.16569	1.84901	1.52406	-0.222621	30.7589	31.4422	31.1172	29.3706	29.5932
P20908	Collagen alpha-1(V) chain	COL5A1		TRUE				enriched			1.82433e-05	2.6222	1.53714	0.0854786	-0.539845	0.316826	0.292847	-0.162564	26.1359	26.9926	26.9686	26.5132	26.6757
P12111	Collagen alpha-3(VI) chain	COL6A3		TRUE				enriched			0.00337893	2.26778	1.62663	0.00444589	-0.451272	0.444748	0.299288	-0.251677	27.1723	28.0684	27.9229	27.3719	27.6236
Q8N668	COMM domain-containing protein 1	COMMD1	TRUE				PD exclusive				NaN	NaN	NaN	NaN	NaN	NaN	NaN	NaN	20.7072	NaN	NaN	NaN	NaN
Q9H0A8	COMM domain-containing protein 4	COMMD4				TRUE				PD exclusive	NaN	NaN	NaN	NaN	NaN	NaN	NaN	NaN	NaN	NaN	NaN	22.429	NaN
P53618	Coatomer subunit beta	COPB1	TRUE				enriched				3.55096	1.24295	0.751046	0.0513531	0.223124	0.105423	0.0712154	-0.153606	28.6088	28.4911	28.4569	28.2321	28.3857
P61201	COP9 signalosome complex subunit 2	COPS2	TRUE				enriched				2.21342	0.720106	0.730018	0.571977	2.25761	0.572865	0.581078	0.367513	25.7983	24.1135	24.1217	23.9082	23.5407
Q14019	Coactosin-like protein	COTL1	TRUE				enriched				2.3612	0.000386194	0.0447093	0.22718	0.127229	-0.160756	-0.065424	-0.0264626	29.0326	28.7446	28.8399	28.8789	28.9053
O75131	Copine-3	CPNE3	TRUE				enriched				2.54199	0.682411	0.150538	0.900992	0.475628	0.0927113	-0.0491219	0.141558	25.4559	25.0729	24.9311	25.1218	24.9802
P36551	Oxygen-dependent coproporphyrinogen-III oxidase, mitochondrial	CPOX				TRUE				PD exclusive	NaN	NaN	NaN	NaN	NaN	NaN	NaN	NaN	NaN	NaN	NaN	22.4566	NaN
P50238	Cysteine-rich protein 1	CRIP1	TRUE	TRUE			PD exclusive	PD exclusive			NaN	NaN	NaN	NaN	NaN	NaN	NaN	NaN	26.1979	26.2182	NaN	NaN	NaN
O75718	Cartilage-associated protein	CRTAP	TRUE				enriched				2.44558	1.82425	0.812623	0.0829165	0.389341	0.154813	0.126442	-0.101111	26.3708	26.1363	26.1079	25.8804	25.9815
P02511	Alpha-crystallin B chain	CRYAB	TRUE		TRUE		enriched		enriched		3.63577	1.90707	2.09975	0.732683	0.443619	0.27751	0.429118	0.0856998	31.5376	31.3715	31.5231	31.1797	31.094
O75390	Citrate synthase, mitochondrial; Citrate synthase	CS	TRUE				enriched				2.09714	0.233428	0.364475	0.142556	0.230752	-0.0274586	0.0107384	-0.0404484	28.2244	27.9662	28.0044	27.9532	27.9937
Q6UVK1	Chondroitin sulfate proteoglycan 4	CSPG4	TRUE				enriched				2.28833	0.0200468	0.157415	0.0933583	0.861967	-0.592355	-0.0725357	-0.187304	26.5925	25.1381	25.658	25.5432	25.7305
Q13363; P56545	C-terminal-binding protein 1; C-terminal-binding protein 2	CTBP1; CTBP2		TRUE	TRUE			PD exclusive	PD exclusive		NaN	NaN	NaN	NaN	NaN	NaN	NaN	NaN	NaN	23.7155	24.0566	NaN	NaN
Q13618	Cullin-3	CUL3		TRUE	TRUE			enriched	enriched		1.49787	2.67874	2.81475	0.415576	0.5365	0.49888	0.46651	0.0274181	26.5983	26.5606	26.5283	26.0892	26.0618
Q9UHQ9	NADH-cytochrome b5 reductase 1	CYB5R1	TRUE				enriched				2.00521	1.62955	1.24599	0.238633	0.383431	0.194801	0.165838	-0.0182011	27.5723	27.3837	27.3547	27.1707	27.1889
P99999	Cytochrome c	CYCS	TRUE				enriched				2.26294	0.788046	1.1169	0.628506	1.15688	0.327548	0.463877	0.2202	25.181	24.3516	24.488	24.2443	24.0241
Q7L576; Q96F07	Cytoplasmic FMR1-interacting protein 1; Cytoplasmic FMR1-interacting protein 2	CYFIP1; CYFIP2	TRUE	TRUE			enriched	enriched			2.14759	2.12744	0.435245	0.0608757	0.369407	0.183432	0.0410728	-0.180185	25.3882	25.2022	25.0599	24.8386	25.0188
P98082	Disabled homolog 2	DAB2	TRUE				enriched				3.75813	0.485203	0.719552	1.52236	1.48135	0.0619726	0.0718529	0.286996	27.3159	26.0566	25.9064	26.1216	25.8346
P14868	Aspartate--tRNA ligase, cytoplasmic	DARS	TRUE				enriched				2.2172	0.442187	0.401324	0.112856	0.236844	0.0374947	0.0245232	-0.0725227	28.076	27.8767	27.8637	27.7667	27.8392
Q13561	Dynactin subunit 2	DCTN2		TRUE				enriched			1.81996	2.12834	1.04851	NaN	0.804954	0.927296	0.543848	0	24.6016	24.7239	24.3405	NaN	23.3614
O95865	N(G),N(G)-dimethylarginine dimethylaminohydrolase 2	DDAH2	TRUE		TRUE		enriched		enriched		2.22849	1.59113	2.29054	1.67438	0.763578	0.763177	0.878707	0.31597	25.9376	25.9372	26.0527	25.4899	25.174
Q96HY6	DDRGK domain-containing protein 1	DDRGK1		TRUE	TRUE			enriched	enriched		0.658348	3.03557	2.64851	0.792096	0.175587	0.745988	0.629208	0.18232	27.4542	28.0246	27.9078	27.4609	27.2786
P30046	D-dopachrome decarboxylase	DDT	TRUE				PD exclusive				NaN	NaN	NaN	NaN	NaN	NaN	NaN	NaN	20.5346	NaN	NaN	NaN	NaN
Q92499	ATP-dependent RNA helicase DDX1	DDX1		TRUE				enriched			0.991808	2.08065	1.64394	0.0220801	0.208369	0.249231	0.150729	-0.160449	27.3832	27.424	27.3255	27.0144	27.1748
Q16698	2,4-dienoyl-CoA reductase, mitochondrial	DECR1	TRUE	TRUE	TRUE		enriched	enriched	enriched		4.34373	3.2153	3.78654	1.61958	5.04201	3.85301	3.09096	0.823981	29.5373	28.3483	27.5863	25.3193	24.4953
O43583	Density-regulated protein	DENR				TRUE				enriched	1.1694	0.0316587	0.138733	2.06592	0.509631	-0.330427	-0.105536	0.328874	27.3506	26.5105	26.7354	27.1699	26.841
Q8TB45	DEP domain-containing mTOR-interacting protein	DEPTOR			TRUE				PD exclusive		NaN	NaN	NaN	NaN	NaN	NaN	NaN	NaN	NaN	NaN	21.6431	NaN	NaN
Q6IAN0	Dehydrogenase/reductase SDR family member 7B	DHRS7B	TRUE				PD exclusive				NaN	NaN	NaN	NaN	NaN	NaN	NaN	NaN	22.6171	NaN	NaN	NaN	NaN
Q12959	Disks large homolog 1	DLG1	TRUE				PD exclusive				NaN	NaN	NaN	NaN	NaN	NaN	NaN	NaN	25.3582	NaN	NaN	NaN	NaN
P36957	Dihydrolipoyllysine-residue succinyltransferase component of 2-oxoglutarate dehydrogenase complex, mitochondrial	DLST	TRUE		TRUE		enriched		enriched		2.59324	1.20955	2.28602	0.492396	0.511307	0.35985	0.26423	0.0356098	27.6793	27.5278	27.4322	27.2036	27.1679
P25685	DnaJ homolog subfamily B member 1	DNAJB1	TRUE	TRUE	TRUE		PD exclusive	PD exclusive	PD exclusive		NaN	NaN	NaN	NaN	NaN	NaN	NaN	NaN	24.3793	24.1496	23.936	NaN	NaN
Q13217	DnaJ homolog subfamily C member 3	DNAJC3	TRUE				enriched				2.61418	1.23227	1.66386	1.29618	2.05194	0.477333	0.557183	0.570942	27.5042	25.9296	26.0094	25.9131	25.4523
Q99615	DnaJ homolog subfamily C member 7	DNAJC7	TRUE				PD exclusive				NaN	NaN	NaN	NaN	NaN	NaN	NaN	NaN	26.0278	NaN	NaN	NaN	NaN
O75937	DnaJ homolog subfamily C member 8	DNAJC8		TRUE				enriched			0.406202	2.24288	0.478997	1.01907	0.19486	0.373947	0.073719	0.370489	25.0961	25.3537	24.8291	25.3503	24.7553
Q9H7D0	Dedicator of cytokinesis protein 5	DOCK5	TRUE	TRUE		TRUE	PD exclusive	PD exclusive		PD exclusive	NaN	NaN	NaN	NaN	NaN	NaN	NaN	NaN	22.0476	22.2919	NaN	22.3789	NaN
O60762	Dolichol-phosphate mannosyltransferase subunit 1	DPM1	TRUE				PD exclusive				NaN	NaN	NaN	NaN	NaN	NaN	NaN	NaN	23.2903	NaN	NaN	NaN	NaN
Q16555	Dihydropyrimidinase-related protein 2	DPYSL2	TRUE				enriched				2.67406	0.136522	0.108903	0.0552948	0.179682	-0.0420963	-0.0237854	-0.0676468	31.2302	31.0085	31.0268	30.9829	31.0506
Q9Y6G9	Cytoplasmic dynein 1 light intermediate chain 1	DYNC1LI1	TRUE				PD exclusive				NaN	NaN	NaN	NaN	NaN	NaN	NaN	NaN	24.8049	NaN	NaN	NaN	NaN
Q9NP97	Dynein light chain roadblock-type 1	DYNLRB1				TRUE				PD exclusive	NaN	NaN	NaN	NaN	NaN	NaN	NaN	NaN	NaN	NaN	NaN	23.395	NaN
P63172	Dynein light chain Tctex-type 1	DYNLT1			TRUE				enriched		0.0028462	0.265004	2.98629	0.500143	-0.36566	-0.0177238	0.232549	0.112467	22.4282	22.7761	23.0264	22.9063	22.7938
O43854	EGF-like repeat and discoidin I-like domain-containing protein 3	EDIL3	TRUE	TRUE	TRUE		enriched	enriched	enriched		4.08729	2.94341	3.52188	0.340323	1.02298	0.773985	0.759167	0.0108578	30.5077	30.2587	30.2439	29.4955	29.4847
Q15075	Early endosome antigen 1	EEA1		TRUE				enriched			1.68897	3.3116	1.61678	1.30918	0.89506	0.431269	0.601031	0.171367	29.2243	28.7605	28.9303	28.5006	28.3293
P68104; Q05639; Q5VTE0	Elongation factor 1-alpha 1; Elongation factor 1-alpha 2; Putative elongation factor 1-alpha-like 3	EEF1A1; EEF1A2; EEF1A1P5	TRUE				enriched				2.00163	1.33922	1.67776	0.540006	0.224815	0.151943	0.155604	0.0492783	34.3251	34.2523	34.2559	34.1496	34.1003
P26641	Elongation factor 1-gamma	EEF1G	TRUE				enriched				3.1742	0.347234	1.50165	0.00480993	0.177099	0.00292053	0.0522594	-0.109513	30.3555	30.1813	30.2307	30.0689	30.1784
P13639	Elongation factor 2	EEF2	TRUE	TRUE	TRUE		enriched	enriched	enriched		4.26412	2.80217	3.13101	0.647002	1.23575	0.445864	0.408703	0.0417095	32.7209	31.931	31.8938	31.5268	31.4851
P98172	Ephrin-B1	EFNB1	TRUE				PD exclusive				NaN	NaN	NaN	NaN	NaN	NaN	NaN	NaN	23.5225	NaN	NaN	NaN	NaN
Q7Z2Z2	Elongation factor Tu GTP-binding domain-containing protein 1	EFTUD1	TRUE				PD exclusive				NaN	NaN	NaN	NaN	NaN	NaN	NaN	NaN	21.8847	NaN	NaN	NaN	NaN
Q9H4M9	EH domain-containing protein 1	EHD1	TRUE				enriched				3.84467	0.707972	1.3395	0.0559441	0.313337	0.0667431	0.0816425	-0.100171	28.6175	28.3709	28.3858	28.204	28.3041
Q9NZN4	EH domain-containing protein 2	EHD2	TRUE	TRUE	TRUE		enriched	enriched	enriched		3.70321	2.49014	2.76125	0.346486	0.38233	0.187342	0.23812	0.0130005	30.2292	30.0343	30.085	29.8599	29.8469
P41567	Eukaryotic translation initiation factor 1	EIF1		TRUE				enriched			0.978042	2.29186	1.51235	1.18645	0.796716	0.575984	0.729065	0.642059	26.2506	26.0298	26.1829	26.0959	25.4538
P19525	Interferon-induced, double-stranded RNA-activated protein kinase	EIF2AK2			TRUE				PD exclusive		NaN	NaN	NaN	NaN	NaN	NaN	NaN	NaN	NaN	NaN	20.9132	NaN	NaN
Q9NR50	Translation initiation factor eIF-2B subunit gamma	EIF2B3	TRUE		TRUE		PD exclusive		PD exclusive		NaN	NaN	NaN	NaN	NaN	NaN	NaN	NaN	21.3776	NaN	21.1127	NaN	NaN
P41091; Q2VIR3	Eukaryotic translation initiation factor 2 subunit 3; Putative eukaryotic translation initiation factor 2 subunit 3-like protein	EIF2S3; EIF2S3L	TRUE				enriched				2.32065	1.40352	0.916571	0.0188911	0.17434	0.0927757	0.096553	-0.122098	27.1587	27.0771	27.0809	26.8622	26.9843
P38919	Eukaryotic initiation factor 4A-III; Eukaryotic initiation factor 4A-III, N-terminally processed	EIF4A3		TRUE				PD exclusive			NaN	NaN	NaN	NaN	NaN	NaN	NaN	NaN	NaN	26.9048	NaN	NaN	NaN
P55010	Eukaryotic translation initiation factor 5	EIF5	TRUE		TRUE		enriched		enriched		2.33338	1.6658	2.68031	1.27432	1.51541	0.539302	0.58236	0.278167	28.978	28.0018	28.0449	27.7407	27.4625
P63241	Eukaryotic translation initiation factor 5A; Eukaryotic translation initiation factor 5A-1	EIF5A			TRUE				enriched		0.116483	0.521514	2.85396	1.18785	-0.156475	0.120725	0.393574	0.376021	28.308	28.5852	28.858	28.8405	28.4645
Q8N766	ER membrane protein complex subunit 1	EMC1		TRUE				PD exclusive			NaN	NaN	NaN	NaN	NaN	NaN	NaN	NaN	NaN	20.661	NaN	NaN	NaN
Q9UHY7	Enolase-phosphatase E1	ENOPH1	TRUE		TRUE		PD exclusive		PD exclusive		NaN	NaN	NaN	NaN	NaN	NaN	NaN	NaN	21.7493	NaN	21.787	NaN	NaN
Q9NZ08	Endoplasmic reticulum aminopeptidase 1	ERAP1	TRUE	TRUE	TRUE		PD exclusive	PD exclusive	PD exclusive		NaN	NaN	NaN	NaN	NaN	NaN	NaN	NaN	20.8831	21.0464	21.0231	NaN	NaN
Q8IUD2	ELKS/Rab6-interacting/CAST family member 1	ERC1	TRUE	TRUE	TRUE	TRUE	PD exclusive	PD exclusive	PD exclusive	PD exclusive	NaN	NaN	NaN	NaN	NaN	NaN	NaN	NaN	26.7055	25.4655	25.3163	23.3346	NaN
Q969X5	Endoplasmic reticulum-Golgi intermediate compartment protein 1	ERGIC1	TRUE				enriched				3.79656	0.447513	1.70579	0.0897015	0.35718	0.0357014	0.140276	-0.101154	26.8185	26.4971	26.6016	26.3602	26.4614
P10768	S-formylglutathione hydrolase	ESD	TRUE				enriched				2.12276	1.5121	1.03957	0.799239	0.824738	0.453844	0.392764	0.295085	27.3089	26.9381	26.877	26.7793	26.4842
Q9BSJ8	Extended synaptotagmin-1	ESYT1	TRUE				enriched				3.74463	0.00504228	0.00734828	0.824579	0.301794	-0.0969654	-0.145052	0.0306545	29.149	28.7503	28.7022	28.8779	28.8472
P38117	Electron transfer flavoprotein subunit beta	ETFB	TRUE	TRUE			enriched	enriched			2.94061	2.06215	1.80918	1.59558	0.737595	0.319205	0.273464	0.0844952	27.9539	27.5355	27.4898	27.3008	27.2163
O95571	Persulfide dioxygenase ETHE1, mitochondrial	ETHE1		TRUE	TRUE			enriched	enriched		NaN	2.15979	2.03125	0.930179	0	0.740443	0.643646	0.348827	NaN	24.0257	23.9289	23.6341	23.2853
Q01844	RNA-binding protein EWS	EWSR1	TRUE	TRUE	TRUE		PD exclusive	PD exclusive	PD exclusive		NaN	NaN	NaN	NaN	NaN	NaN	NaN	NaN	24.8584	25.0321	25.0332	NaN	NaN
O60645	Exocyst complex component 3	EXOC3	TRUE	TRUE	TRUE		PD exclusive	PD exclusive	PD exclusive		NaN	NaN	NaN	NaN	NaN	NaN	NaN	NaN	23.6798	23.6348	23.5292	NaN	NaN
Q96A65	Exocyst complex component 4	EXOC4	TRUE	TRUE	TRUE	TRUE	PD exclusive	PD exclusive	PD exclusive	PD exclusive	NaN	NaN	NaN	NaN	NaN	NaN	NaN	NaN	24.7143	24.6687	24.7698	24.7249	NaN
O00471	Exocyst complex component 5	EXOC5	TRUE				PD exclusive				NaN	NaN	NaN	NaN	NaN	NaN	NaN	NaN	23.151	NaN	NaN	NaN	NaN
Q9Y2D4	Exocyst complex component 6B	EXOC6B	TRUE	TRUE	TRUE		PD exclusive	PD exclusive	PD exclusive		NaN	NaN	NaN	NaN	NaN	NaN	NaN	NaN	23.9047	22.9964	22.9862	NaN	NaN
Q8IYI6	Exocyst complex component 8	EXOC8	TRUE				PD exclusive				NaN	NaN	NaN	NaN	NaN	NaN	NaN	NaN	22.8414	NaN	NaN	NaN	NaN
Q9Y2C4	Nuclease EXOG, mitochondrial	EXOG	TRUE				PD exclusive				NaN	NaN	NaN	NaN	NaN	NaN	NaN	NaN	21.1613	NaN	NaN	NaN	NaN
Q8IWE2	Protein NOXP20	FAM114A1		TRUE				enriched			0.461681	2.10174	0.40561	0.199539	0.0713379	0.112392	0.036359	-0.0195454	25.0797	25.1207	25.0447	24.9888	25.0083
Q96A26	Protein FAM162A	FAM162A	TRUE				PD exclusive				NaN	NaN	NaN	NaN	NaN	NaN	NaN	NaN	24.7308	NaN	NaN	NaN	NaN
Q15018	BRISC complex subunit Abro1	FAM175B				TRUE				PD exclusive	NaN	NaN	NaN	NaN	NaN	NaN	NaN	NaN	NaN	NaN	NaN	23.8461	NaN
Q8NCA5	Protein FAM98A	FAM98A	TRUE	TRUE			PD exclusive	PD exclusive			NaN	NaN	NaN	NaN	NaN	NaN	NaN	NaN	25.0458	24.5779	NaN	NaN	NaN
P25445	Tumor necrosis factor receptor superfamily member 6	FAS	TRUE	TRUE			PD exclusive	PD exclusive			NaN	NaN	NaN	NaN	NaN	NaN	NaN	NaN	25.1862	24.5555	NaN	NaN	NaN
P22830	Ferrochelatase, mitochondrial	FECH	TRUE		TRUE	TRUE	PD exclusive		PD exclusive	PD exclusive	NaN	NaN	NaN	NaN	NaN	NaN	NaN	NaN	24.6385	NaN	24.5875	24.3826	NaN
Q14192	Four and a half LIM domains protein 2	FHL2	TRUE				enriched				3.063	1.22762	1.0659	0.674526	0.603587	0.178794	0.215129	0.0759731	29.7209	29.2961	29.3324	29.1933	29.1173
Q9Y613	FH1/FH2 domain-containing protein 1	FHOD1				TRUE				PD exclusive	NaN	NaN	NaN	NaN	NaN	NaN	NaN	NaN	NaN	NaN	NaN	22.1818	NaN
Q9Y3D6	Mitochondrial fission 1 protein	FIS1			TRUE	TRUE			PD exclusive	PD exclusive	NaN	NaN	NaN	NaN	NaN	NaN	NaN	NaN	NaN	NaN	21.6188	21.566	NaN
Q96AY3	Peptidyl-prolyl cis-trans isomerase FKBP10	FKBP10	TRUE				enriched				3.20934	0.772308	1.15323	0.346931	0.477531	0.104508	0.181298	0.0111015	28.7827	28.4097	28.4865	28.3163	28.3052
Q14318	Peptidyl-prolyl cis-trans isomerase FKBP8	FKBP8	TRUE	TRUE			enriched	enriched			2.24909	2.00752	NaN	1.11487	0.768997	0.357138	0	0.290812	24.2803	23.8684	NaN	23.8706	23.5113
P21333	Filamin-A	FLNA	TRUE	TRUE	TRUE		enriched	enriched	enriched		3.81655	2.69664	2.81482	0.882508	0.506485	0.255641	0.224345	0.0789703	35.597	35.3461	35.3148	35.1695	35.0905
O75369	Filamin-B	FLNB	TRUE	TRUE	TRUE		enriched	enriched	enriched		5.4252	2.66441	2.63792	0.440151	0.631125	0.369572	0.34418	0.0242142	31.9127	31.6512	31.6258	31.3058	31.2816
Q14315	Filamin-C	FLNC	TRUE				enriched				2.55929	1.23224	1.32346	0.111994	0.28874	0.120794	0.119932	-0.0437008	30.0899	29.9219	29.921	29.7574	29.8011
P02751	Fibronectin; Anastellin; Ugl-Y1; Ugl-Y2; Ugl-Y3	FN1		TRUE				enriched			0.0401158	2.17669	1.85448	0.695382	-0.147652	0.2007	0.16671	0.101102	29.4117	29.76	29.726	29.6604	29.5593
P11413	Glucose-6-phosphate 1-dehydrogenase	G6PD	TRUE				enriched				2.87239	1.09657	1.89986	0.101788	0.198481	0.0537781	0.0940998	-0.0506248	30.312	30.1673	30.2077	30.0629	30.1136
O95166; P60520; Q9H0R8	Gamma-aminobutyric acid receptor-associated protein; Gamma-aminobutyric acid receptor-associated protein-like 1; Gamma-aminobutyric acid receptor-associated protein-like 2	GABARAP; GABARAPL1; GABARAPL2	TRUE				PD exclusive				NaN	NaN	NaN	NaN	NaN	NaN	NaN	NaN	25.6256	NaN	NaN	NaN	NaN
P51570	Galactokinase	GALK1		TRUE				enriched			1.71498	2.03126	1.64667	0.550739	0.341209	0.318169	0.21896	0.0857368	23.7316	23.7086	23.6093	23.4761	23.3904
Q10472	Polypeptide N-acetylgalactosaminyltransferase 1; Polypeptide N-acetylgalactosaminyltransferase 1 soluble form	GALNT1	TRUE	TRUE	TRUE		enriched	enriched	enriched		5.00342	2.41014	2.51676	1.56188	1.23913	0.586489	0.531041	0.252446	28.0376	27.3849	27.3295	27.0509	26.7985
Q14697	Neutral alpha-glucosidase AB	GANAB	TRUE				enriched				3.01594	0.303971	0.168722	0.0273791	0.205893	0.000204468	-0.0153816	-0.143243	30.6081	30.4024	30.3868	30.259	30.4022
P41250	Glycine--tRNA ligase	GARS	TRUE				enriched				4.12123	1.46979	1.99533	0.955602	0.28134	0.042907	0.0494156	0.0542339	31.1439	30.9055	30.912	30.9168	30.8626
Q92538	Golgi-specific brefeldin A-resistance guanine nucleotide exchange factor 1	GBF1	TRUE				PD exclusive				NaN	NaN	NaN	NaN	NaN	NaN	NaN	NaN	23.6044	NaN	NaN	NaN	NaN
Q92947	Glutaryl-CoA dehydrogenase, mitochondrial	GCDH	TRUE				PD exclusive				NaN	NaN	NaN	NaN	NaN	NaN	NaN	NaN	23.2385	NaN	NaN	NaN	NaN
Q92616	Translational activator GCN1	GCN1L1	TRUE				enriched				2.88947	0.399906	0.394633	0.0148557	0.50832	0.0206814	0.0210392	-0.196828	27.4169	26.9292	26.9296	26.7117	26.9085
Q96RP9	Elongation factor G, mitochondrial	GFM1	TRUE				PD exclusive				NaN	NaN	NaN	NaN	NaN	NaN	NaN	NaN	21.028	NaN	NaN	NaN	NaN
Q06210; O94808	Glutamine--fructose-6-phosphate aminotransferase [isomerizing] 1; Glutamine--fructose-6-phosphate aminotransferase [isomerizing] 2	GFPT1; GFPT2	TRUE				enriched				2.71467	1.4355	0.813568	0.113992	0.31128	0.0898666	0.0707928	-0.0805847	28.8765	28.6551	28.636	28.4846	28.5652
P36269	Gamma-glutamyltransferase 5; Gamma-glutamyltransferase 5 heavy chain; Gamma-glutamyltransferase 5 light chain	GGT5	TRUE				PD exclusive				NaN	NaN	NaN	NaN	NaN	NaN	NaN	NaN	21.6291	NaN	NaN	NaN	NaN
Q92896	Golgi apparatus protein 1	GLG1				TRUE				enriched	0.498328	0.635452	0.252321	2.15934	0.127515	0.0990509	-0.0213383	0.228526	27.4306	27.4021	27.2818	27.5316	27.3031
O76003	Glutaredoxin-3	GLRX3	TRUE				PD exclusive				NaN	NaN	NaN	NaN	NaN	NaN	NaN	NaN	22.5125	NaN	NaN	NaN	NaN
O94925	Glutaminase kidney isoform, mitochondrial	GLS	TRUE				enriched				2.96608	0.0271714	0.00480728	0.170914	0.204443	-0.0533344	-0.114241	-0.0249287	28.2628	28.005	27.9441	28.0334	28.0584
P00367; P49448	Glutamate dehydrogenase 1, mitochondrial; Glutamate dehydrogenase 2, mitochondrial	GLUD1; GLUD2	TRUE				enriched				3.01499	0.711999	0.997561	0.919825	2.40605	0.0825031	0.136848	0.126255	29.609	27.2855	27.3398	27.3292	27.203
Q14344	Guanine nucleotide-binding protein subunit alpha-13	GNA13	TRUE				PD exclusive				NaN	NaN	NaN	NaN	NaN	NaN	NaN	NaN	22.6862	NaN	NaN	NaN	NaN
P08754	Guanine nucleotide-binding protein G(k) subunit alpha	GNAI3			TRUE				PD exclusive		NaN	NaN	NaN	NaN	NaN	NaN	NaN	NaN	NaN	NaN	22.75	NaN	NaN
P46926	Glucosamine-6-phosphate isomerase; Glucosamine-6-phosphate isomerase 1	GNPDA1	TRUE				enriched				2.07682	NaN	NaN	1.04032	1.1806	0	0	0.297845	25.0252	NaN	NaN	24.1424	23.8446
Q96EK6	Glucosamine 6-phosphate N-acetyltransferase	GNPNAT1	TRUE				PD exclusive				NaN	NaN	NaN	NaN	NaN	NaN	NaN	NaN	25.1926	NaN	NaN	NaN	NaN
Q14789	Golgin subfamily B member 1	GOLGB1	TRUE	TRUE	TRUE		PD exclusive	PD exclusive	PD exclusive		NaN	NaN	NaN	NaN	NaN	NaN	NaN	NaN	25.9636	26.1057	25.9035	NaN	NaN
O00461	Golgi integral membrane protein 4	GOLIM4	TRUE	TRUE			PD exclusive	PD exclusive			NaN	NaN	NaN	NaN	NaN	NaN	NaN	NaN	24.7792	24.9346	NaN	NaN	NaN
P00505	Aspartate aminotransferase, mitochondrial	GOT2	TRUE				enriched				2.37872	0.480994	0.197007	0.142658	0.274627	0.0277134	-0.0352077	-0.0818027	28.0211	27.7742	27.7113	27.6647	27.7465
P36969	Glutathione peroxidase; Phospholipid hydroperoxide glutathione peroxidase, mitochondrial	GPX4	TRUE	TRUE			PD exclusive	PD exclusive			NaN	NaN	NaN	NaN	NaN	NaN	NaN	NaN	23.8219	22.9323	NaN	NaN	NaN
Q8TED1	Probable glutathione peroxidase 8; Glutathione peroxidase	GPX8	TRUE				enriched				2.11916	1.50162	1.77655	1.26693	0.715574	0.311889	0.30977	0.118474	27.6755	27.2718	27.2697	27.0784	26.9599
Q9UBQ7	Glyoxylate reductase/hydroxypyruvate reductase	GRHPR	TRUE				enriched				2.83271	1.0141	0.321843	1.71674	0.311961	0.0479183	0.00644989	0.211591	26.9198	26.6557	26.6143	26.8194	26.6078
P06396	Gelsolin	GSN	TRUE		TRUE		enriched		enriched		2.96879	1.48326	3.42209	0.916414	0.778945	0.412678	0.420224	0.102008	28.363	27.9968	28.0043	27.6861	27.5841
P00390	Glutathione reductase, mitochondrial	GSR	TRUE	TRUE	TRUE	TRUE	enriched	enriched	enriched	enriched	2.95199	4.55345	4.52099	2.51803	1.64083	1.2314	1.09765	0.633193	28.7773	28.3678	28.2341	27.7696	27.1364
P78417	Glutathione S-transferase omega-1	GSTO1	TRUE				enriched				3.34916	0.0294892	0.12633	0.0636586	0.199398	-0.0589111	-0.0213734	-0.0709194	28.3191	28.0607	28.0983	28.0487	28.1197
Q16836	Hydroxyacyl-coenzyme A dehydrogenase, mitochondrial	HADH		TRUE	TRUE			enriched	enriched		0.980572	2.93091	2.31885	0.156704	0.0739731	0.140866	0.278712	-0.024408	25.8542	25.9211	26.059	25.7558	25.7803
Q7Z4V5	Hepatoma-derived growth factor-related protein 2	HDGFRP2	TRUE				PD exclusive				NaN	NaN	NaN	NaN	NaN	NaN	NaN	NaN	24.6133	NaN	NaN	NaN	NaN
Q00341	Vigilin	HDLBP	TRUE				enriched				2.89926	0.127148	0.506627	0.290779	0.564464	-0.0132198	0.0279232	-0.00241661	28.9855	28.4079	28.449	28.4187	28.4211
Q86XA9	HEAT repeat-containing protein 5A	HEATR5A	TRUE				PD exclusive				NaN	NaN	NaN	NaN	NaN	NaN	NaN	NaN	21.7602	NaN	NaN	NaN	NaN
P49773	Histidine triad nucleotide-binding protein 1	HINT1	TRUE				PD exclusive				NaN	NaN	NaN	NaN	NaN	NaN	NaN	NaN	25.5797	NaN	NaN	NaN	NaN
P19367	Hexokinase-1	HK1	TRUE				enriched				2.07003	0.871668	1.09048	0.0860253	0.151836	0.0971882	0.0713318	-0.0812763	29.4959	29.4413	29.4154	29.2628	29.3441
P04439	HLA class I histocompatibility antigen, A-3 alpha chain	HLA-A	TRUE			TRUE	PD exclusive			PD exclusive	NaN	NaN	NaN	NaN	NaN	NaN	NaN	NaN	23.8421	NaN	NaN	23.8705	NaN
P35914	Hydroxymethylglutaryl-CoA lyase, mitochondrial	HMGCL	TRUE		TRUE		enriched		enriched		2.05057	1.04693	2.45666	0.806714	0.238413	0.141771	0.299021	0.150687	25.4621	25.3655	25.5227	25.3744	25.2237
P09601	Heme oxygenase 1	HMOX1	TRUE				PD exclusive				NaN	NaN	NaN	NaN	NaN	NaN	NaN	NaN	25.4835	NaN	NaN	NaN	NaN
Q13151	Heterogeneous nuclear ribonucleoprotein A0	HNRNPA0	TRUE				PD exclusive				NaN	NaN	NaN	NaN	NaN	NaN	NaN	NaN	24.0325	NaN	NaN	NaN	NaN
P51991	Heterogeneous nuclear ribonucleoprotein A3	HNRNPA3	TRUE				PD exclusive				NaN	NaN	NaN	NaN	NaN	NaN	NaN	NaN	25.7422	NaN	NaN	NaN	NaN
P61978	Heterogeneous nuclear ribonucleoprotein K	HNRNPK	TRUE				enriched				2.62997	1.27466	1.59746	1.04787	0.399183	0.245538	0.250371	0.0965183	28.5824	28.4288	28.4336	28.2798	28.1832
Q86VS8	Protein Hook homolog 3	HOOK3	TRUE			TRUE	PD exclusive			PD exclusive	NaN	NaN	NaN	NaN	NaN	NaN	NaN	NaN	22.979	NaN	NaN	22.9834	NaN
P51659	Peroxisomal multifunctional enzyme type 2; (3R)-hydroxyacyl-CoA dehydrogenase; Enoyl-CoA hydratase 2	HSD17B4			TRUE				enriched		1.91405	1.95874	2.15577	0.492921	0.414131	0.292994	0.23108	0.0466312	28.141	28.0198	27.9579	27.7735	27.7268
P07900	Heat shock protein HSP 90-alpha	HSP90AA1	TRUE				enriched				3.4228	0.58875	1.26181	0.125567	0.329219	0.0283726	0.104305	-0.0416214	32.1317	31.8309	31.9068	31.7609	31.8025
P08238	Heat shock protein HSP 90-beta	HSP90AB1	TRUE				enriched				4.42032	1.07509	1.31684	0.171012	0.377471	0.0667618	0.0982822	-0.0228809	30.6252	30.3145	30.346	30.2248	30.2477
P14625	Endoplasmin	HSP90B1	TRUE				enriched				2.67667	0.345256	0.910669	0.222018	0.276467	0.00608826	0.0486992	-0.0197826	32.4166	32.1462	32.1888	32.1203	32.1401
P0DMV8; P0DMV9	Heat shock 70 kDa protein 1B; Heat shock 70 kDa protein 1A	HSPA1B; HSPA1A	TRUE				enriched				2.85458	1.42573	1.60456	1.74283	0.312947	0.161211	0.197924	0.136176	30.4845	30.3327	30.3695	30.3077	30.1715
P34932	Heat shock 70 kDa protein 4	HSPA4	TRUE		TRUE		enriched		enriched		2.48105	1.00424	2.20148	0.816856	0.390008	0.0725113	0.0944981	0.0662891	29.1383	28.8208	28.8428	28.8146	28.7483
P11021	78 kDa glucose-regulated protein	HSPA5	TRUE				enriched				2.81218	0.991531	1.12472	1.72536	0.238092	0.0641396	0.0544022	0.100303	32.135	31.961	31.9513	31.9972	31.8969
P11142	Heat shock cognate 71 kDa protein	HSPA8	TRUE				enriched				3.89354	0.822876	1.76083	0.181818	0.255461	0.0583115	0.103828	-0.0172806	32.5293	32.3321	32.3776	32.2565	32.2738
Q92743	Serine protease HTRA1	HTRA1		TRUE	TRUE			enriched	enriched		1.99223	2.24873	2.35846	NaN	0.801243	0.463597	0.363638	0	24.6234	24.2857	24.1858	NaN	23.8221
Q9Y4L1	Hypoxia up-regulated protein 1	HYOU1	TRUE				enriched				3.35364	1.94999	1.80154	0.865662	0.663428	0.369968	0.317498	0.122548	30.2154	29.922	29.8695	29.6745	29.552
Q2TAA2	Isoamyl acetate-hydrolyzing esterase 1 homolog	IAH1	TRUE				PD exclusive				NaN	NaN	NaN	NaN	NaN	NaN	NaN	NaN	23.5296	NaN	NaN	NaN	NaN
P14735	Insulin-degrading enzyme	IDE	TRUE			TRUE	PD exclusive			PD exclusive	NaN	NaN	NaN	NaN	NaN	NaN	NaN	NaN	22.073	NaN	NaN	22.2692	NaN
P35475	Alpha-L-iduronidase	IDUA		TRUE				enriched			0.909674	2.27701	1.79876	NaN	0.67698	1.47926	1.09337	0	24.971	25.7733	25.3874	NaN	24.2941
Q12905	Interleukin enhancer-binding factor 2	ILF2	TRUE				enriched				2.28223	1.08312	1.43696	0.754867	0.847309	0.529744	0.539774	0.20925	24.4878	24.1702	24.1802	23.8497	23.6405
P12268	Inosine-5-monophosphate dehydrogenase 2	IMPDH2	TRUE		TRUE		enriched		enriched		2.97096	1.61115	2.00198	1.45012	3.25217	0.648326	0.615567	0.394961	28.8368	26.3568	26.2002	25.9796	25.5847
P49441	Inositol polyphosphate 1-phosphatase	INPP1	TRUE				PD exclusive				NaN	NaN	NaN	NaN	NaN	NaN	NaN	NaN	20.4391	NaN	NaN	NaN	NaN
P05556	Integrin beta-1	ITGB1	TRUE				enriched				2.57849	0.162362	0.456429	0.478593	0.600444	-0.122765	0.043285	0.0482407	27.0878	26.3646	26.5307	26.5356	26.4874
Q15046	Lysine--tRNA ligase	KARS	TRUE				enriched				4.44834	0.51274	0.628843	0.551097	0.770847	0.0237854	0.0513863	0.0807648	27.4297	26.6827	26.7103	26.7396	26.6589
Q96CX2	BTB/POZ domain-containing protein KCTD12	KCTD12		TRUE		TRUE		enriched		enriched	0.466962	2.57038	1.76666	2.06517	0.0280346	0.267088	0.170763	0.0934288	28.6834	28.9225	28.8261	28.7488	28.6554
Q9NS86	LanC-like protein 2	LANCL2	TRUE				PD exclusive				NaN	NaN	NaN	NaN	NaN	NaN	NaN	NaN	23.9162	NaN	NaN	NaN	NaN
P28838	Cytosol aminopeptidase	LAP3	TRUE				enriched				2.62434	0.164771	1.13389	0.699949	0.301525	-0.0369373	0.0907356	0.0611004	26.4005	26.0621	26.1897	26.1601	26.099
Q6PKG0	La-related protein 1	LARP1		TRUE	TRUE			enriched	enriched		0.0159197	3.48987	2.48478	0.1237	-1.01895	0.578793	0.606878	-0.159482	24.2429	25.8406	25.8687	25.1023	25.2618
P00338	L-lactate dehydrogenase A chain	LDHA	TRUE				enriched				2.8266	0.55215	1.22941	0.136955	0.296562	0.0289223	0.0955093	-0.0604286	33.3099	33.0422	33.1088	32.9529	33.0133
Q5SW96	Low density lipoprotein receptor adapter protein 1	LDLRAP1	TRUE	TRUE			PD exclusive	PD exclusive			NaN	NaN	NaN	NaN	NaN	NaN	NaN	NaN	20.7282	21.2049	NaN	NaN	NaN
Q8NC56	LEM domain-containing protein 2	LEMD2			TRUE				PD exclusive		NaN	NaN	NaN	NaN	NaN	NaN	NaN	NaN	NaN	NaN	23.7307	NaN	NaN
Q8IVL6	Prolyl 3-hydroxylase 3	LEPREL2	TRUE				PD exclusive				NaN	NaN	NaN	NaN	NaN	NaN	NaN	NaN	24.4401	NaN	NaN	NaN	NaN
Q99538	Legumain	LGMN	TRUE				PD exclusive				NaN	NaN	NaN	NaN	NaN	NaN	NaN	NaN	27.4274	NaN	NaN	NaN	NaN
Q9UHB6	LIM domain and actin-binding protein 1	LIMA1	TRUE				enriched				2.37789	0.73158	0.709836	0.200598	0.63365	0.214928	0.165645	-0.0358192	25.9005	25.4818	25.4325	25.2311	25.2669
Q9C0E8	Protein lunapark	LNP	TRUE		TRUE		PD exclusive		PD exclusive		NaN	NaN	NaN	NaN	NaN	NaN	NaN	NaN	24.0337	NaN	23.8146	NaN	NaN
Q9UIQ6	Leucyl-cystinyl aminopeptidase; Leucyl-cystinyl aminopeptidase, pregnancy serum form	LNPEP	TRUE				PD exclusive				NaN	NaN	NaN	NaN	NaN	NaN	NaN	NaN	22.4857	NaN	NaN	NaN	NaN
Q07954	Prolow-density lipoprotein receptor-related protein 1	LRP1	TRUE				enriched				2.62964	1.13159	1.16375	0.101807	0.418953	0.100705	0.132954	-0.0899536	29.2587	28.9405	28.9727	28.7498	28.8398
P30533	Alpha-2-macroglobulin receptor-associated protein	LRPAP1	TRUE	TRUE	TRUE	TRUE	enriched	enriched	enriched	enriched	3.10422	3.61679	3.72924	3.83949	0.753922	1.38486	1.32623	1.46248	28.9454	29.5764	29.5177	29.654	28.1915
Q32MZ4	Leucine-rich repeat flightless-interacting protein 1	LRRFIP1	TRUE				enriched				2.06635	0.053773	NaN	1.43421	0.651869	-0.772094	0	0.532545	26.9025	25.4105	NaN	26.7831	26.2506
Q9Y608	Leucine-rich repeat flightless-interacting protein 2	LRRFIP2	TRUE				PD exclusive				NaN	NaN	NaN	NaN	NaN	NaN	NaN	NaN	25.0242	NaN	NaN	NaN	NaN
Q9NQ48	Leucine zipper transcription factor-like protein 1	LZTFL1	TRUE				PD exclusive				NaN	NaN	NaN	NaN	NaN	NaN	NaN	NaN	24.7584	NaN	NaN	NaN	NaN
Q9H0U3	Magnesium transporter protein 1	MAGT1	TRUE	TRUE			PD exclusive	PD exclusive			NaN	NaN	NaN	NaN	NaN	NaN	NaN	NaN	26.2667	24.5976	NaN	NaN	NaN
P46734	Dual specificity mitogen-activated protein kinase kinase 3	MAP2K3			TRUE				enriched		1.05883	1.3346	2.85113	0.12353	0.206966	0.122907	0.300175	-0.0601688	25.4555	25.3714	25.5487	25.1884	25.2485
P31152; Q16659; P27361	Mitogen-activated protein kinase 4; Mitogen-activated protein kinase 6; Mitogen-activated protein kinase 3	MAPK4; MAPK6; MAPK3	TRUE				enriched				2.47597	1.41358	1.44195	1.56346	0.538231	0.256759	0.408659	0.16524	26.921	26.6395	26.7914	26.548	26.3827
Q15691	Microtubule-associated protein RP/EB family member 1	MAPRE1	TRUE				enriched				2.68129	1.40388	1.14783	1.96946	4.65098	1.322	1.44017	1.86091	29.1447	25.8157	26.3741	26.3546	24.4937
P56192	Methionine--tRNA ligase, cytoplasmic	MARS	TRUE				enriched				3.4062	0.210348	0.11317	0.321483	0.395359	-0.0360126	-0.0666542	0.00375786	27.0513	26.62	26.5893	26.6597	26.656
Q9Y316	Protein MEMO1	MEMO1	TRUE				PD exclusive				NaN	NaN	NaN	NaN	NaN	NaN	NaN	NaN	20.033	NaN	NaN	NaN	NaN
Q14696	LDLR chaperone MESD	MESDC2	TRUE				PD exclusive				NaN	NaN	NaN	NaN	NaN	NaN	NaN	NaN	27.3261	NaN	NaN	NaN	NaN
Q08431	Lactadherin; Lactadherin short form; Medin	MFGE8	TRUE				enriched				2.63351	1.59234	0.587742	0.240595	0.354298	0.153886	0.041975	-0.0238506	28.5499	28.3495	28.2376	28.1718	28.1956
Q8TDZ2	Protein-methionine sulfoxide oxidase MICAL1	MICAL1	TRUE				PD exclusive				NaN	NaN	NaN	NaN	NaN	NaN	NaN	NaN	22.211	NaN	NaN	NaN	NaN
Q7Z3U7	Protein MON2 homolog	MON2	TRUE				PD exclusive				NaN	NaN	NaN	NaN	NaN	NaN	NaN	NaN	20.2584	NaN	NaN	NaN	NaN
Q9Y6C9	Mitochondrial carrier homolog 2	MTCH2	TRUE				enriched				3.89819	0.975954	1.504	0.529435	0.406112	0.130097	0.299948	0.101069	25.2445	24.9685	25.1384	24.9395	24.8384
P11586	C-1-tetrahydrofolate synthase, cytoplasmic; Methylenetetrahydrofolate dehydrogenase; Methenyltetrahydrofolate cyclohydrolase; Formyltetrahydrofolate synthetase; C-1-tetrahydrofolate synthase, cytoplasmic, N-terminally processed	MTHFD1	TRUE				enriched				2.46046	0.442939	0.221476	0.392678	0.352701	0.0462711	-0.0130756	0.0195969	27.4663	27.1599	27.1005	27.1332	27.1136
P60660	Myosin light polypeptide 6	MYL6	TRUE		TRUE		enriched		enriched		3.11296	0.763554	4.07738	0.0819703	0.695483	0.235162	0.503155	-0.239514	26.8603	26.3999	26.6679	25.9253	26.1648
Q9NZM1	Myoferlin	MYOF			TRUE				enriched		1.90282	1.55453	2.48182	0.127594	0.33603	0.0696205	0.0882275	-0.037907	32.1278	31.8614	31.88	31.7539	31.7918
Q13564	NEDD8-activating enzyme E1 regulatory subunit	NAE1				TRUE				enriched	0.883263	NaN	1.58713	2.0422	0.253123	0	0.347076	0.384273	25.0382	NaN	25.1321	25.1693	24.7851
O43776	Asparagine--tRNA ligase, cytoplasmic	NARS	TRUE				enriched				2.24971	0.00347845	0.00476063	0.548242	0.130237	-0.191786	-0.112576	0.0401848	29.1615	28.8394	28.9187	29.0714	29.0312
P19338	Nucleolin	NCL	TRUE				enriched				2.64758	NaN	0.0832934	0.270205	2.41009	0	-0.541123	-0.0344353	27.5044	NaN	25.3759	25.8826	25.0943
Q92542	Nicastrin	NCSTN	TRUE				PD exclusive				NaN	NaN	NaN	NaN	NaN	NaN	NaN	NaN	21.1159	NaN	NaN	NaN	NaN
Q16795	NADH dehydrogenase [ubiquinone] 1 alpha subcomplex subunit 9, mitochondrial	NDUFA9	TRUE	TRUE	TRUE		PD exclusive	PD exclusive	PD exclusive		NaN	NaN	NaN	NaN	NaN	NaN	NaN	NaN	22.1197	22.2099	22.2766	NaN	NaN
O95139	NADH dehydrogenase [ubiquinone] 1 beta subcomplex subunit 6	NDUFB6	TRUE				PD exclusive				NaN	NaN	NaN	NaN	NaN	NaN	NaN	NaN	23.1291	NaN	NaN	NaN	NaN
P49821	NADH dehydrogenase [ubiquinone] flavoprotein 1, mitochondrial	NDUFV1	TRUE				PD exclusive				NaN	NaN	NaN	NaN	NaN	NaN	NaN	NaN	23.5736	NaN	NaN	NaN	NaN
Q9UFN0	Protein NipSnap homolog 3A	NIPSNAP3A	TRUE	TRUE			PD exclusive	PD exclusive			NaN	NaN	NaN	NaN	NaN	NaN	NaN	NaN	24.9344	23.2647	NaN	NaN	NaN
O60361; P22392	Nucleoside diphosphate kinase; Nucleoside diphosphate kinase B	NME2; NME1	TRUE				enriched				2.17813	0.911545	1.66683	0.0530764	0.272701	0.0846039	0.127853	-0.111014	29.4074	29.2193	29.2625	29.0237	29.1347
O60551	Glycylpeptide N-tetradecanoyltransferase; Glycylpeptide N-tetradecanoyltransferase 2	NMT2			TRUE	TRUE			PD exclusive	PD exclusive	NaN	NaN	NaN	NaN	NaN	NaN	NaN	NaN	NaN	NaN	22.7315	23.0991	NaN
P40261	Nicotinamide N-methyltransferase	NNMT	TRUE				enriched				3.21098	0.468424	1.60695	0.800837	0.486133	0.024102	0.196119	0.111491	29.1499	28.6879	28.8599	28.7753	28.6638
Q9UM47	Neurogenic locus notch homolog protein 3; Notch 3 extracellular truncation; Notch 3 intracellular domain	NOTCH3	TRUE	TRUE		TRUE	PD exclusive	PD exclusive		PD exclusive	NaN	NaN	NaN	NaN	NaN	NaN	NaN	NaN	26.1987	25.7907	NaN	25.6193	NaN
P55786	Puromycin-sensitive aminopeptidase	NPEPPS	TRUE				enriched				2.44334	0.711648	0.763659	0.0829392	0.3062	0.0617393	0.0608952	-0.06175	28.2353	27.9909	27.99	27.8674	27.9291
P17342	Atrial natriuretic peptide receptor 3	NPR3	TRUE				enriched				2.05321	0.726194	0.492804	0.258963	0.192176	0.0684879	0.0230675	-0.0139462	27.573	27.4493	27.4039	27.3669	27.3808
P15559	NAD(P)H dehydrogenase [quinone] 1	NQO1	TRUE				enriched				2.87444	0.131027	0.493424	0.00572066	0.257516	-0.0720779	0.039801	-0.168672	29.7743	29.4447	29.5566	29.3481	29.5168
P16083	Ribosyldihydronicotinamide dehydrogenase [quinone]	NQO2	TRUE				PD exclusive				NaN	NaN	NaN	NaN	NaN	NaN	NaN	NaN	23.3199	NaN	NaN	NaN	NaN
P46459	Vesicle-fusing ATPase	NSF	TRUE				enriched				2.91688	0.819052	0.299582	0.0568632	0.473455	0.064727	-0.000229645	-0.0733036	27.5846	27.1759	27.1109	27.0378	27.1111
Q9NZJ9	Diphosphoinositol polyphosphate phosphohydrolase 2	NUDT4	TRUE				PD exclusive				NaN	NaN	NaN	NaN	NaN	NaN	NaN	NaN	25.1391	NaN	NaN	NaN	NaN
P61970	Nuclear transport factor 2	NUTF2	TRUE				PD exclusive				NaN	NaN	NaN	NaN	NaN	NaN	NaN	NaN	23.0969	NaN	NaN	NaN	NaN
P22059; Q969R2	Oxysterol-binding protein 1; Oxysterol-binding protein 2	OSBP; OSBP2	TRUE		TRUE		enriched		enriched		4.02674	1.27472	2.21301	0.602784	0.797418	0.267136	0.239737	0.169864	26.7144	26.1841	26.1567	26.0868	25.9169
Q92791	Endoplasmic reticulum protein SC65	P3H4			TRUE				PD exclusive		NaN	NaN	NaN	NaN	NaN	NaN	NaN	NaN	NaN	NaN	20.5672	NaN	NaN
O15460	Prolyl 4-hydroxylase subunit alpha-2	P4HA2	TRUE				enriched				2.21317	0.660436	0.875351	0.54341	0.195047	0.0875706	0.108086	0.0456093	29.101	28.9935	29.014	28.9515	28.9059
P07237	Protein disulfide-isomerase	P4HB	TRUE				enriched				2.71257	0.601581	1.22716	0.0654891	0.286121	0.0549995	0.117039	-0.0427872	31.514	31.2829	31.3449	31.1851	31.2279
Q13310	Polyadenylate-binding protein; Polyadenylate-binding protein 4	PABPC4	TRUE	TRUE	TRUE		PD exclusive	PD exclusive	PD exclusive		NaN	NaN	NaN	NaN	NaN	NaN	NaN	NaN	23.494	23.4833	23.5607	NaN	NaN
P43034	Platelet-activating factor acetylhydrolase IB subunit alpha	PAFAH1B1	TRUE	TRUE	TRUE		enriched	enriched	enriched		2.46989	2.03774	2.13152	0.221904	0.412976	0.384626	0.362757	-0.0320889	27.3594	27.3311	27.3092	26.9143	26.9464
P22234	Multifunctional protein ADE2; Phosphoribosylaminoimidazole-succinocarboxamide synthase; Phosphoribosylaminoimidazole carboxylase	PAICS	TRUE				enriched				2.5561	1.2464	0.866973	1.17591	0.596791	0.283354	0.153704	0.145313	26.4149	26.1015	25.9718	25.9634	25.8181
Q8WX93	Palladin	PALLD	TRUE				enriched				2.95413	0.6124	1.25186	0.642169	0.977848	0.0594543	0.146007	0.153985	30.5469	29.6285	29.7151	29.7231	29.5691
Q9Y3D7; Q9ULL5	Coronin; Mitochondrial import inner membrane translocase subunit TIM16	PAM16; CORO7-PAM16				TRUE				PD exclusive	NaN	NaN	NaN	NaN	NaN	NaN	NaN	NaN	NaN	NaN	NaN	25.3148	NaN
Q96IZ0	PRKC apoptosis WT1 regulator protein	PAWR				TRUE				enriched	0.00977148	0.0509135	0.190568	2.81005	-0.769534	-0.0912224	-0.0558529	0.158823	26.7635	27.4418	27.4772	27.6918	27.533
Q9UHG3	Prenylcysteine oxidase 1	PCYOX1	TRUE				enriched				2.9211	0.0036852	0.0758494	0.229929	0.144466	-0.208603	-0.07892	-0.00715599	28.0522	27.6992	27.8289	27.9006	27.9078
Q8WUM4	Programmed cell death 6-interacting protein	PDCD6IP	TRUE				enriched				2.96488	1.76474	0.931953	0.271146	0.277904	0.148079	0.0861229	-0.00698395	29.4313	29.3015	29.2395	29.1464	29.1534
P16234; P09619	Platelet-derived growth factor receptor beta; Platelet-derived growth factor receptor alpha	PDGFRB; PDGFRA	TRUE				enriched				2.48334	0.412582	0.440749	0.0508736	0.437266	0.0283825	0.0339962	-0.287811	27.6152	27.2063	27.2119	26.8901	27.1779
P13667	Protein disulfide-isomerase A4	PDIA4				TRUE				enriched	1.50573	0.00348497	0.0347464	2.28491	0.106711	-0.210946	-0.0857391	0.129297	30.1298	29.8121	29.9373	30.1524	30.0231
Q96HC4	PDZ and LIM domain protein 5	PDLIM5	TRUE		TRUE		enriched		enriched		2.19567	1.49451	2.02103	1.07323	0.641871	0.279145	0.279304	0.0880421	30.4003	30.0376	30.0377	29.8464	29.7584
Q15121	Astrocytic phosphoprotein PEA-15	PEA15			TRUE	TRUE			enriched	enriched	1.75001	0.823692	2.72094	2.05596	0.784898	0.409899	0.580835	0.235046	25.3522	24.9772	25.1481	24.8918	24.5673
O96011	Peroxisomal membrane protein 11B	PEX11B	TRUE				PD exclusive				NaN	NaN	NaN	NaN	NaN	NaN	NaN	NaN	23.929	NaN	NaN	NaN	NaN
P17858	ATP-dependent 6-phosphofructokinase, liver type	PFKL	TRUE				enriched				2.39884	1.035	1.23861	0.0131733	0.246261	0.0978382	0.114357	-0.289417	27.67	27.5216	27.5381	27.1344	27.4238
P18669	Phosphoglycerate mutase 1	PGAM1	TRUE				enriched				2.07483	1.49838	1.339	0.292178	0.465796	0.336187	0.303012	-0.00303345	31.4408	31.3112	31.278	30.972	30.975
P52209	6-phosphogluconate dehydrogenase, decarboxylating	PGD	TRUE				enriched				2.34512	0.00176673	0.148885	0.0470216	0.0913471	-0.134131	-0.0463676	-0.0663124	29.2099	28.9845	29.0722	29.0523	29.1186
P00558	Phosphoglycerate kinase 1	PGK1	TRUE				enriched				3.65912	0.681527	1.76893	0.387459	0.321935	0.0388393	0.0700848	0.0093338	32.2511	31.968	31.9992	31.9385	31.9291
O95336	6-phosphogluconolactonase	PGLS			TRUE				enriched		1.87609	1.47992	2.04995	1.07324	0.578227	0.304744	0.512069	0.243839	26.4828	26.2093	26.4166	26.1484	25.9046
Q6PCE3	Glucose 1,6-bisphosphate synthase	PGM2L1	TRUE				PD exclusive				NaN	NaN	NaN	NaN	NaN	NaN	NaN	NaN	23.4865	NaN	NaN	NaN	NaN
O15173	Membrane-associated progesterone receptor component 2	PGRMC2	TRUE		TRUE		PD exclusive		PD exclusive		NaN	NaN	NaN	NaN	NaN	NaN	NaN	NaN	24.5243	NaN	24.3287	NaN	NaN
O43175	D-3-phosphoglycerate dehydrogenase	PHGDH	TRUE				enriched				2.1843	1.33124	1.56062	0.0684295	0.345034	0.097797	0.143439	-0.0608345	28.6537	28.4065	28.4522	28.2479	28.3087
Q9BTU6	Phosphatidylinositol 4-kinase type 2-alpha	PI4K2A	TRUE				PD exclusive				NaN	NaN	NaN	NaN	NaN	NaN	NaN	NaN	23.1951	NaN	NaN	NaN	NaN
Q92508	Piezo-type mechanosensitive ion channel component 1	PIEZO1	TRUE				PD exclusive				NaN	NaN	NaN	NaN	NaN	NaN	NaN	NaN	24.7594	NaN	NaN	NaN	NaN
Q00169	Phosphatidylinositol transfer protein alpha isoform	PITPNA	TRUE				PD exclusive				NaN	NaN	NaN	NaN	NaN	NaN	NaN	NaN	26.412	NaN	NaN	NaN	NaN
P48739	Phosphatidylinositol transfer protein beta isoform	PITPNB	TRUE				PD exclusive				NaN	NaN	NaN	NaN	NaN	NaN	NaN	NaN	23.7621	NaN	NaN	NaN	NaN
Q8IV08	Phospholipase D3	PLD3	TRUE				enriched				3.17173	0.117475	0.36911	0.665067	0.469464	-0.0612953	0.0127239	0.0452766	25.224	24.6932	24.7673	24.7998	24.7545
O00469	Procollagen-lysine,2-oxoglutarate 5-dioxygenase 2	PLOD2	TRUE				enriched				3.66323	0.242436	1.09018	0.010497	0.416877	-0.00954285	0.0851631	-0.121893	29.1126	28.6862	28.7809	28.5738	28.6957
Q9NP80; P42704	Calcium-independent phospholipase A2-gamma; Leucine-rich PPR motif-containing protein, mitochondrial	PNPLA8; LRPPRC	TRUE				enriched				2.20598	0.98027	0.649197	0.723667	0.407613	0.206299	0.102736	0.141452	26.3507	26.1494	26.0458	26.0845	25.9431
Q9H2U2	Inorganic pyrophosphatase 2, mitochondrial	PPA2	TRUE		TRUE		PD exclusive		PD exclusive		NaN	NaN	NaN	NaN	NaN	NaN	NaN	NaN	24.2991	NaN	23.8429	NaN	NaN
P62937	Peptidyl-prolyl cis-trans isomerase A	PPIA	TRUE				enriched				3.30741	1.02701	1.13742	0.805316	0.509859	0.370466	0.417924	0.104309	30.7544	30.615	30.6625	30.3489	30.2446
Q08752	Peptidyl-prolyl cis-trans isomerase D	PPID	TRUE				PD exclusive				NaN	NaN	NaN	NaN	NaN	NaN	NaN	NaN	24.188	NaN	NaN	NaN	NaN
P36873	Serine/threonine-protein phosphatase; Serine/threonine-protein phosphatase PP1-gamma catalytic subunit	PPP1CC			TRUE				PD exclusive		NaN	NaN	NaN	NaN	NaN	NaN	NaN	NaN	NaN	NaN	23.0385	NaN	NaN
Q16537	Serine/threonine-protein phosphatase 2A 56 kDa regulatory subunit epsilon isoform	PPP2R5E	TRUE				PD exclusive				NaN	NaN	NaN	NaN	NaN	NaN	NaN	NaN	22.8478	NaN	NaN	NaN	NaN
Q08209; P16298; P48454	Serine/threonine-protein phosphatase 2B catalytic subunit alpha isoform; Serine/threonine-protein phosphatase 2B catalytic subunit beta isoform; Serine/threonine-protein phosphatase 2B catalytic subunit gamma isoform	PPP3CA; PPP3CB; PPP3CC	TRUE		TRUE		enriched		enriched		2.33667	1.7628	2.35212	0.385917	0.380996	0.184397	0.212611	0.0217255	26.3981	26.2015	26.2297	26.0388	26.0171
P53041	Serine/threonine-protein phosphatase; Serine/threonine-protein phosphatase 5	PPP5C	TRUE			TRUE	PD exclusive			PD exclusive	NaN	NaN	NaN	NaN	NaN	NaN	NaN	NaN	25.6738	NaN	NaN	25.0297	NaN
Q06830	Peroxiredoxin-1	PRDX1	TRUE				enriched				3.67516	0.778835	1.55033	1.95271	0.629882	0.0651836	0.144313	0.135812	30.2159	29.6512	29.7303	29.7218	29.586
P30044	Peroxiredoxin-5, mitochondrial	PRDX5			TRUE				enriched		1.93175	0.512473	2.13384	1.34187	0.356895	0.0556595	0.227113	0.0861477	26.2338	25.9326	26.104	25.9631	25.8769
P30041	Peroxiredoxin-6	PRDX6	TRUE				enriched				2.8887	0.106658	0.342468	0.0965245	0.17581	-0.0263741	0.00341415	-0.0231194	29.1788	28.9767	29.0065	28.9799	29.003
Q13131	5-AMP-activated protein kinase catalytic subunit alpha-1	PRKAA1		TRUE	TRUE			enriched	enriched		0.898299	2.03136	2.54623	1.26568	0.108242	0.251335	0.262557	0.146603	25.4042	25.5473	25.5585	25.4426	25.296
P10644	cAMP-dependent protein kinase type I-alpha regulatory subunit	PRKAR1A	TRUE				enriched				2.21301	0.371709	0.569323	0.0982226	0.279179	0.0297108	0.0911545	-0.0431156	27.0089	26.7594	26.8209	26.6866	26.7297
P13861	cAMP-dependent protein kinase type II-alpha regulatory subunit	PRKAR2A	TRUE				PD exclusive				NaN	NaN	NaN	NaN	NaN	NaN	NaN	NaN	23.4493	NaN	NaN	NaN	NaN
P78527	DNA-dependent protein kinase catalytic subunit	PRKDC	TRUE				enriched				2.03871	1.08148	1.44241	0.898854	1.42969	0.683693	1.11073	0.425468	24.3974	23.6514	24.0785	23.9484	22.9677
O94903	Proline synthase co-transcribed bacterial homolog protein	PROSC	TRUE				PD exclusive				NaN	NaN	NaN	NaN	NaN	NaN	NaN	NaN	23.6251	NaN	NaN	NaN	NaN
P54821; Q99811	Paired mesoderm homeobox protein 1; Paired mesoderm homeobox protein 2	PRRX1; PRRX2		TRUE				PD exclusive			NaN	NaN	NaN	NaN	NaN	NaN	NaN	NaN	NaN	22.8391	NaN	NaN	NaN
P25789	Proteasome subunit alpha type-4; Proteasome subunit alpha type	PSMA4	TRUE				enriched				5.42429	0.581758	0.746645	1.39932	0.424895	0.0643211	0.12215	0.140067	26.7772	26.4166	26.4744	26.4924	26.3523
P60900	Proteasome subunit alpha type; Proteasome subunit alpha type-6	PSMA6	TRUE				enriched				2.79947	0.971527	1.22319	0.259343	0.648449	0.156912	0.153154	-0.00922165	27.2875	26.7959	26.7922	26.6298	26.639
O14818	Proteasome subunit alpha type-7	PSMA7	TRUE				enriched				2.75393	1.17335	1.9206	0.684099	0.507243	0.139006	0.24712	0.090461	28.6786	28.3103	28.4184	28.2618	28.1713
P28074	Proteasome subunit beta type-5	PSMB5	TRUE				enriched				3.05655	1.60639	1.41421	0.570651	0.541056	0.22809	0.219219	0.0879829	28.1596	27.8466	27.8377	27.7065	27.6185
O43242	26S proteasome non-ATPase regulatory subunit 3	PSMD3	TRUE				enriched				2.05539	1.19097	1.33736	0.478016	0.256795	0.133318	0.16366	0.0377197	27.8799	27.7564	27.7868	27.6609	27.6231
Q15008	26S proteasome non-ATPase regulatory subunit 6	PSMD6	TRUE				enriched				2.41687	1.02508	1.03791	0.0835128	0.491649	0.154734	0.210033	-0.0991501	26.0034	25.6665	25.7218	25.4126	25.5118
P48556	26S proteasome non-ATPase regulatory subunit 8	PSMD8	TRUE	TRUE			PD exclusive	PD exclusive			NaN	NaN	NaN	NaN	NaN	NaN	NaN	NaN	22.9784	22.8637	NaN	NaN	NaN
O95456	Proteasome assembly chaperone 1	PSMG1	TRUE				PD exclusive				NaN	NaN	NaN	NaN	NaN	NaN	NaN	NaN	22.4644	NaN	NaN	NaN	NaN
P26599	Polypyrimidine tract-binding protein 1	PTBP1	TRUE				enriched				3.45784	0.966603	0.77088	0.782951	2.47287	0.337298	0.196445	0.19901	28.3001	26.1645	26.0236	26.0262	25.8272
Q13308	Inactive tyrosine-protein kinase 7	PTK7	TRUE	TRUE	TRUE		enriched	enriched	enriched		4.01673	2.84733	2.87883	1.55742	2.01686	0.882181	0.896337	0.538814	26.6423	25.5076	25.5218	25.1642	24.6254
Q12974	Protein tyrosine phosphatase type IVA 2	PTP4A2	TRUE				PD exclusive				NaN	NaN	NaN	NaN	NaN	NaN	NaN	NaN	23.9735	NaN	NaN	NaN	NaN
Q9Y3E5	Peptidyl-tRNA hydrolase 2, mitochondrial	PTRH2	TRUE				PD exclusive				NaN	NaN	NaN	NaN	NaN	NaN	NaN	NaN	23.5153	NaN	NaN	NaN	NaN
P47897	Glutamine--tRNA ligase	QARS	TRUE				enriched				2.07443	0.584828	0.649755	0.0271598	0.47676	0.122249	0.147796	-0.469055	25.959	25.6045	25.63	25.0132	25.4822
Q14964; P20340; Q9NRW1	Ras-related protein Rab-39A; Ras-related protein Rab-6A; Ras-related protein Rab-6B	RAB39A; RAB6A; RAB6B	TRUE				enriched				3.13381	0.299025	0.627329	0.244618	0.457861	-0.000870514	0.119239	-0.0215702	27.4655	27.0068	27.1269	26.9861	27.0077
P61020	Ras-related protein Rab-5B	RAB5B			TRUE				enriched		0.287959	0.734071	2.40375	0.117096	-0.00548515	0.0833038	0.159838	-0.121002	25.328	25.4168	25.4933	25.2125	25.3335
P11233	Ras-related protein Ral-A	RALA	TRUE	TRUE	TRUE		enriched	enriched	enriched		4.2786	3.577	3.7389	1.13577	2.3806	1.84407	1.7765	0.598745	28.355	27.8185	27.7509	26.5732	25.9744
P11234	Ras-related protein Ral-B	RALB	TRUE				PD exclusive				NaN	NaN	NaN	NaN	NaN	NaN	NaN	NaN	24.9043	NaN	NaN	NaN	NaN
P46060	Ran GTPase-activating protein 1	RANGAP1		TRUE	TRUE			PD exclusive	PD exclusive		NaN	NaN	NaN	NaN	NaN	NaN	NaN	NaN	NaN	28.0568	27.9297	NaN	NaN
P54136	Arginine--tRNA ligase, cytoplasmic	RARS	TRUE		TRUE		enriched		enriched		3.21748	1.91553	2.19227	0.210309	0.613935	0.220125	0.214899	-0.0309113	27.3077	26.9138	26.9086	26.6628	26.6937
Q09028; Q16576	Histone-binding protein RBBP7; Histone-binding protein RBBP4	RBBP7; RBBP4			TRUE	TRUE			PD exclusive	PD exclusive	NaN	NaN	NaN	NaN	NaN	NaN	NaN	NaN	NaN	NaN	22.5686	22.5455	NaN
P98179	RNA-binding protein 3	RBM3	TRUE				PD exclusive				NaN	NaN	NaN	NaN	NaN	NaN	NaN	NaN	23.5866	NaN	NaN	NaN	NaN
P27694; P29597	Replication protein A 70 kDa DNA-binding subunit; Replication protein A 70 kDa DNA-binding subunit, N-terminally processed; Tyrosine-protein kinase; Non-receptor tyrosine-protein kinase TYK2	RPA1; TYK2	TRUE				PD exclusive				NaN	NaN	NaN	NaN	NaN	NaN	NaN	NaN	22.5461	NaN	NaN	NaN	NaN
P49207	60S ribosomal protein L34	RPL34	TRUE				PD exclusive				NaN	NaN	NaN	NaN	NaN	NaN	NaN	NaN	26.1186	NaN	NaN	NaN	NaN
Q02878	60S ribosomal protein L6	RPL6	TRUE				enriched				2.22944	0.0228935	0.204651	0.150499	0.548034	-0.189365	-0.077829	-0.131496	28.4371	27.6997	27.8113	27.7576	27.8891
P15880	40S ribosomal protein S2	RPS2	TRUE	TRUE	TRUE		enriched	enriched	enriched		2.32773	2.01789	2.89539	0.128358	0.428821	0.337591	0.510013	-0.158316	26.6235	26.5322	26.7046	26.0363	26.1946
P62987; P62979; P0CG47; P0CG48	Ubiquitin-40S ribosomal protein S27a; Ubiquitin; 40S ribosomal protein S27a; Polyubiquitin-C; Ubiquitin; Ubiquitin-60S ribosomal protein L40; Ubiquitin; 60S ribosomal protein L40; Polyubiquitin-B; Ubiquitin	RPS27A; UBC; UBB; UBA52	TRUE	TRUE			enriched	enriched			3.20657	2.09134	1.79181	0.734288	0.922213	0.774804	0.770936	0.231547	28.1389	27.9915	27.9876	27.4482	27.2167
P62273	40S ribosomal protein S29	RPS29	TRUE	TRUE	TRUE		PD exclusive	PD exclusive	PD exclusive		NaN	NaN	NaN	NaN	NaN	NaN	NaN	NaN	25.0026	24.9943	25.3838	NaN	NaN
P46782	40S ribosomal protein S5; 40S ribosomal protein S5, N-terminally processed	RPS5		TRUE				enriched			0.010094	2.02388	1.14628	1.60522	-0.631603	0.29088	0.171078	0.185775	28.9116	29.8341	29.7143	29.729	29.5432
Q9NQC3	Reticulon-4	RTN4	TRUE				enriched				2.5805	0.402989	0.735821	0.438834	1.49024	0.0642155	0.115897	0.0245331	29.432	28.006	28.0577	27.9663	27.9418
P60903	Protein S100-A10	S100A10	TRUE				enriched				2.24689	1.36113	1.75339	1.94948	1.24971	0.814944	0.903633	0.3362	29.4119	28.9772	29.0658	28.4984	28.1622
Q99584	Protein S100-A13	S100A13	TRUE				enriched				2.59361	0.258613	NaN	0.111844	1.8832	-0.0622116	0	-0.293745	28.3143	26.3689	NaN	26.5763	26.4311
P49591	Serine--tRNA ligase, cytoplasmic	SARS	TRUE				enriched				3.46477	0.248316	0.310726	1.06949	0.4006	-0.0153492	0.00262794	0.116069	29.2503	28.8344	28.8523	28.9658	28.8497
Q8NBX0	Saccharopine dehydrogenase-like oxidoreductase	SCCPDH	TRUE				enriched				2.63964	0.791957	1.01296	0.460238	0.385195	0.134568	0.185646	0.0789982	26.1839	25.9332	25.9843	25.8777	25.7987
P22307	Non-specific lipid-transfer protein	SCP2	TRUE				enriched				2.21212	0.395987	0.971843	0.413759	0.45104	0.0271591	0.108365	0.0321796	25.4472	25.0233	25.1045	25.0283	24.9961
Q99470	Stromal cell-derived factor 2	SDF2	TRUE		TRUE		PD exclusive		PD exclusive		NaN	NaN	NaN	NaN	NaN	NaN	NaN	NaN	24.561	NaN	24.6608	NaN	NaN
Q9Y6Y8	SEC23-interacting protein	SEC23IP	TRUE	TRUE	TRUE		enriched	enriched	enriched		3.36561	3.10446	2.33839	0.303204	0.643761	0.602198	0.542184	0.00119362	25.9794	25.9378	25.8778	25.3368	25.3356
O94979	Protein transport protein Sec31A	SEC31A	TRUE	TRUE			enriched	enriched			3.09864	2.44809	1.92246	0.167836	0.291299	0.200415	0.145502	-0.0409748	29.2654	29.1745	29.1196	28.9331	28.9741
P60468	Protein transport protein Sec61 subunit beta	SEC61B		TRUE	TRUE	TRUE		enriched	enriched	enriched	0.646593	2.56886	2.0766	2.40841	0.174839	0.303409	0.282448	0.285347	27.121	27.2495	27.2286	27.2315	26.9461
Q9UBV2	Protein sel-1 homolog 1	SEL1L	TRUE		TRUE		PD exclusive		PD exclusive		NaN	NaN	NaN	NaN	NaN	NaN	NaN	NaN	23.9562	NaN	23.6821	NaN	NaN
Q92599	Septin-8	SEPT8	TRUE	TRUE		TRUE	PD exclusive	PD exclusive		PD exclusive	NaN	NaN	NaN	NaN	NaN	NaN	NaN	NaN	25.9507	25.6366	NaN	25.431	NaN
Q9UHD8	Septin-9	SEPT9		TRUE				enriched			0.620874	2.03942	1.50603	0.971049	0.0895882	0.140799	0.143247	0.101038	29.5328	29.584	29.5865	29.5443	29.4432
P50452	Serpin B8	SERPINB8			TRUE				PD exclusive		NaN	NaN	NaN	NaN	NaN	NaN	NaN	NaN	NaN	NaN	22.4645	NaN	NaN
P05121	Plasminogen activator inhibitor 1	SERPINE1	TRUE				enriched				2.39733	0.399234	0.952173	0.0936344	0.344385	0.0170712	0.0624138	-0.1084	25.3383	25.011	25.0563	24.8855	24.9939
Q15637	Splicing factor 1	SF1	TRUE	TRUE	TRUE		PD exclusive	PD exclusive	PD exclusive		NaN	NaN	NaN	NaN	NaN	NaN	NaN	NaN	23.6186	22.5094	22.6002	NaN	NaN
P23246	Splicing factor, proline- and glutamine-rich	SFPQ		TRUE	TRUE			enriched	enriched		1.5978	2.35715	2.0464	0.58009	0.583522	0.995554	0.921643	0.152442	24.8007	25.2127	25.1388	24.2353	24.2171
O43556	Epsilon-sarcoglycan	SGCE	TRUE				PD exclusive				NaN	NaN	NaN	NaN	NaN	NaN	NaN	NaN	22.1508	NaN	NaN	NaN	NaN
Q9H788	SH2 domain-containing protein 4A	SH2D4A	TRUE			TRUE	PD exclusive			PD exclusive	NaN	NaN	NaN	NaN	NaN	NaN	NaN	NaN	24.0839	NaN	NaN	24.206	NaN
Q99961	Endophilin-A2	SH3GL1	TRUE				enriched				4.3244	0.117635	0.380185	0.969848	1.36325	-0.063401	0.0320511	0.14617	26.6373	25.2107	25.3061	25.4202	25.2741
Q96B97	SH3 domain-containing kinase-binding protein 1	SH3KBP1	TRUE	TRUE		TRUE	enriched	enriched		enriched	2.20779	2.06356	1.37792	2.11971	1.77016	0.694459	0.830355	0.848343	25.7653	25.2355	24.8255	24.8434	23.9951
Q15477	Helicase SKI2W	SKIV2L	TRUE				PD exclusive				NaN	NaN	NaN	NaN	NaN	NaN	NaN	NaN	21.4492	NaN	NaN	NaN	NaN
P53007	Tricarboxylate transport protein, mitochondrial	SLC25A1	TRUE				enriched				2.43528	0.137506	0.206575	0.414529	0.189843	-0.0883408	-0.0181004	0.0371517	26.4099	26.1317	26.2019	26.2572	26.22
Q00325	Phosphate carrier protein, mitochondrial	SLC25A3	TRUE				enriched				2.4488	0.989832	0.659998	0.158964	0.274267	0.153994	0.0924141	-0.081012	29.7592	29.6389	29.5774	29.4039	29.4849
P12235	ADP/ATP translocase 1	SLC25A4	TRUE				enriched				3.14697	0.281646	0.333216	0.0596408	0.381509	-0.00669746	0.0050106	-0.115757	25.0312	24.643	24.6547	24.534	24.6497
P12236	ADP/ATP translocase 3; ADP/ATP translocase 3, N-terminally processed	SLC25A6	TRUE				enriched				3.14093	0.975494	0.677671	0.129935	0.254386	0.0814861	0.0609375	-0.0847275	30.2044	30.0315	30.011	29.8653	29.95
P11166	Solute carrier family 2, facilitated glucose transporter member 1	SLC2A1	TRUE				enriched				3.51369	0.0568982	0.907614	0.162921	0.712242	-0.225236	0.149314	-0.0847355	25.1067	24.1693	24.5438	24.3098	24.3945
Q8NBS3; P30101	Sodium bicarbonate transporter-like protein 11; Protein disulfide-isomerase A3	SLC4A11; PDIA3	TRUE		TRUE		enriched		enriched		2.82914	1.15747	2.23732	0.716105	0.909866	0.0896919	0.141211	0.0242355	32.2353	31.4151	31.4666	31.3496	31.3254
Q01650	Large neutral amino acids transporter small subunit 1	SLC7A5				TRUE				enriched	1.28109	0.741625	0.895787	2.41564	0.292357	0.237794	0.204171	0.473855	25.8547	25.8001	25.7665	26.0362	25.5623
O75094	Slit homolog 3 protein	SLIT3	TRUE				PD exclusive				NaN	NaN	NaN	NaN	NaN	NaN	NaN	NaN	21.1551	NaN	NaN	NaN	NaN
P17405	Sphingomyelin phosphodiesterase	SMPD1	TRUE				PD exclusive				NaN	NaN	NaN	NaN	NaN	NaN	NaN	NaN	22.6546	NaN	NaN	NaN	NaN
Q13884	Beta-1-syntrophin	SNTB1	TRUE				PD exclusive				NaN	NaN	NaN	NaN	NaN	NaN	NaN	NaN	24.9461	NaN	NaN	NaN	NaN
O60749	Sorting nexin-2	SNX2	TRUE				enriched				2.84637	0.801879	0.802918	0.393565	0.804242	0.188443	0.140815	0.0283634	27.1356	26.5198	26.4722	26.3597	26.3313
Q9UNH7	Sorting nexin-6	SNX6	TRUE				enriched				2.3957	0.361123	0.368902	0.196299	0.724282	0.0270126	0.0193554	-0.0442425	27.5339	26.8366	26.829	26.7654	26.8096
P09486	SPARC	SPARC	TRUE				enriched				2.94683	1.48688	1.94849	0.0810552	1.00475	0.290274	0.407047	-0.293342	26.476	25.7615	25.8783	25.4047	25.4712
P49458	Signal recognition particle 9 kDa protein	SRP9	TRUE	TRUE			PD exclusive	PD exclusive			NaN	NaN	NaN	NaN	NaN	NaN	NaN	NaN	24.4207	23.9149	NaN	NaN	NaN
Q01130	Serine/arginine-rich splicing factor 2	SRSF2		TRUE	TRUE			PD exclusive	PD exclusive		NaN	NaN	NaN	NaN	NaN	NaN	NaN	NaN	NaN	23.188	23.3749	NaN	NaN
Q04837	Single-stranded DNA-binding protein, mitochondrial	SSBP1	TRUE				PD exclusive				NaN	NaN	NaN	NaN	NaN	NaN	NaN	NaN	24.8326	NaN	NaN	NaN	NaN
O95793	Double-stranded RNA-binding protein Staufen homolog 1	STAU1	TRUE				PD exclusive				NaN	NaN	NaN	NaN	NaN	NaN	NaN	NaN	24.0233	NaN	NaN	NaN	NaN
P31948	Stress-induced-phosphoprotein 1	STIP1	TRUE		TRUE		enriched		enriched		2.71826	1.48835	2.49237	NaN	3.4077	0.465805	0.772651	0	27.4677	24.9555	24.8327	NaN	24.06
O00506; Q9Y6E0	Serine/threonine-protein kinase 24; Serine/threonine-protein kinase 24 36 kDa subunit; Serine/threonine-protein kinase 24 12 kDa subunit	STK24; STK26	TRUE				PD exclusive				NaN	NaN	NaN	NaN	NaN	NaN	NaN	NaN	22.332	NaN	NaN	NaN	NaN
Q15208	Serine/threonine-protein kinase 38	STK38				TRUE				PD exclusive	NaN	NaN	NaN	NaN	NaN	NaN	NaN	NaN	NaN	NaN	NaN	23.7793	NaN
Q9UNE7	E3 ubiquitin-protein ligase CHIP	STUB1	TRUE				PD exclusive				NaN	NaN	NaN	NaN	NaN	NaN	NaN	NaN	23.1068	NaN	NaN	NaN	NaN
Q86Y82	Syntaxin-12	STX12	TRUE				PD exclusive				NaN	NaN	NaN	NaN	NaN	NaN	NaN	NaN	25.433	NaN	NaN	NaN	NaN
Q12846	Syntaxin-4	STX4	TRUE				PD exclusive				NaN	NaN	NaN	NaN	NaN	NaN	NaN	NaN	23.5993	NaN	NaN	NaN	NaN
O15400	Syntaxin-7	STX7	TRUE				PD exclusive				NaN	NaN	NaN	NaN	NaN	NaN	NaN	NaN	24.9806	NaN	NaN	NaN	NaN
Q9UNK0	Syntaxin-8	STX8	TRUE				PD exclusive				NaN	NaN	NaN	NaN	NaN	NaN	NaN	NaN	23.6965	NaN	NaN	NaN	NaN
P53597	Succinyl-CoA ligase [ADP/GDP-forming] subunit alpha, mitochondrial	SUCLG1	TRUE				enriched				2.03407	0.813171	0.392969	0.00609702	0.293645	0.158213	0.0611572	-0.274985	27.0423	26.9069	26.8098	26.4737	26.7487
Q9UH65	Switch-associated protein 70	SWAP70		TRUE	TRUE			enriched	enriched		1.08727	3.47739	3.3761	0.644396	0.229855	0.44842	0.401448	0.0909561	28.7768	28.9954	28.9484	28.6379	28.5469
O60506	Heterogeneous nuclear ribonucleoprotein Q	SYNCRIP	TRUE	TRUE	TRUE		enriched	enriched	enriched		5.00173	3.95049	4.3816	0.631771	1.38135	1.19668	1.10275	0.0503983	28.3836	28.1989	28.105	27.0527	27.0023
Q92804	TATA-binding protein-associated factor 2N	TAF15		TRUE	TRUE			PD exclusive	PD exclusive		NaN	NaN	NaN	NaN	NaN	NaN	NaN	NaN	NaN	24.8021	24.6013	NaN	NaN
P37837	Transaldolase	TALDO1	TRUE		TRUE		enriched		enriched		2.09263	1.1318	2.10192	0.771469	0.336366	0.183258	0.281085	0.093227	30.7542	30.6011	30.6989	30.511	30.4178
Q9BYX2	TBC1 domain family member 2A	TBC1D2		TRUE				enriched			1.6513	2.00797	1.77702	1.33295	0.857808	0.773627	0.755098	0.332677	24.334	24.2499	24.2313	24.2463	23.4762
Q9Y4C2	TRPM8 channel-associated factor 1	TCAF1	TRUE	TRUE	TRUE		PD exclusive	PD exclusive	PD exclusive		NaN	NaN	NaN	NaN	NaN	NaN	NaN	NaN	23.1726	23.1042	22.8857	NaN	NaN
P23193	Transcription elongation factor A protein 1	TCEA1		TRUE	TRUE			enriched	enriched		1.63754	2.46001	2.18812	0.42054	0.93529	0.298132	0.34497	0.060685	27.685	27.0479	27.0947	26.8104	26.7497
Q15370	Transcription elongation factor B polypeptide 2	TCEB2	TRUE	TRUE	TRUE	TRUE	enriched	enriched	enriched	enriched	2.78497	2.90929	3.46304	2.06113	1.91422	1.25584	1.19355	0.439207	25.0297	24.3713	24.309	23.837	23.1154
Q9UGI8	Testin	TES	TRUE				enriched				3.69553	1.06706	1.29217	0.452892	0.386216	0.160775	0.161805	0.0275505	28.0804	27.8549	27.856	27.7217	27.6941
Q9NXG2	THUMP domain-containing protein 1	THUMPD1	TRUE				PD exclusive				NaN	NaN	NaN	NaN	NaN	NaN	NaN	NaN	22.4942	NaN	NaN	NaN	NaN
P01033	Metalloproteinase inhibitor 1	TIMP1	TRUE				PD exclusive				NaN	NaN	NaN	NaN	NaN	NaN	NaN	NaN	24.5519	NaN	NaN	NaN	NaN
O00142	Thymidine kinase 2, mitochondrial	TK2	TRUE	TRUE			PD exclusive	PD exclusive			NaN	NaN	NaN	NaN	NaN	NaN	NaN	NaN	24.1762	24.6657	NaN	NaN	NaN
P29401	Transketolase	TKT	TRUE				enriched				2.7804	1.48839	1.6909	0.306156	0.248416	0.129862	0.165471	0.0010479	31.0965	30.978	31.0136	30.8491	30.8481
Q6P9B6	TLD domain-containing protein 1	TLDC1	TRUE	TRUE	TRUE		PD exclusive	PD exclusive	PD exclusive		NaN	NaN	NaN	NaN	NaN	NaN	NaN	NaN	21.45	21.1274	21.2936	NaN	NaN
Q9UM00	Transmembrane and coiled-coil domain-containing protein 1	TMCO1	TRUE	TRUE	TRUE	TRUE	PD exclusive	PD exclusive	PD exclusive	PD exclusive	NaN	NaN	NaN	NaN	NaN	NaN	NaN	NaN	23.4886	23.3276	23.5583	23.5009	NaN
Q9BVK6	Transmembrane emp24 domain-containing protein 9	TMED9	TRUE				PD exclusive				NaN	NaN	NaN	NaN	NaN	NaN	NaN	NaN	23.2678	NaN	NaN	NaN	NaN
Q9BVC6	Transmembrane protein 109	TMEM109	TRUE				PD exclusive				NaN	NaN	NaN	NaN	NaN	NaN	NaN	NaN	26.7787	NaN	NaN	NaN	NaN
Q9H1E5	Thioredoxin-related transmembrane protein 4	TMX4	TRUE				PD exclusive				NaN	NaN	NaN	NaN	NaN	NaN	NaN	NaN	20.9144	NaN	NaN	NaN	NaN
Q9HBL0	Tensin-1	TNS1	TRUE	TRUE			enriched	enriched			2.45414	2.15338	0.998698	0.483238	0.676679	0.523886	0.239017	0.0553986	26.5798	26.427	26.1421	25.9585	25.9031
O94826	Mitochondrial import receptor subunit TOM70	TOMM70A	TRUE	TRUE	TRUE		enriched	enriched	enriched		2.0434	3.48394	3.48486	1.09097	1.27631	1.03347	0.941774	0.265605	28.5124	28.2695	28.1778	27.5017	27.2361
Q53FA7	Quinone oxidoreductase PIG3	TP53I3	TRUE				PD exclusive				NaN	NaN	NaN	NaN	NaN	NaN	NaN	NaN	28.4021	NaN	NaN	NaN	NaN
O43399	Tumor protein D54	TPD52L2	TRUE				PD exclusive				NaN	NaN	NaN	NaN	NaN	NaN	NaN	NaN	23.4406	NaN	NaN	NaN	NaN
P60174	Triosephosphate isomerase	TPI1	TRUE				enriched				2.34804	0.259722	0.862748	0.421097	0.220502	-0.01049	0.122602	0.014801	30.9369	30.7059	30.839	30.7312	30.7164
P09493	Tropomyosin alpha-1 chain	TPM1	TRUE	TRUE			PD exclusive	PD exclusive			NaN	NaN	NaN	NaN	NaN	NaN	NaN	NaN	26.8321	25.2736	NaN	NaN	NaN
P29144	Tripeptidyl-peptidase 2	TPP2	TRUE		TRUE		enriched		enriched		3.55773	1.88406	2.60241	0.533071	0.803012	0.446005	0.400396	0.0936298	26.4804	26.1234	26.0778	25.7711	25.6774
P13693	Translationally-controlled tumor protein	TPT1			TRUE				enriched		0.98319	1.88042	2.12389	0.152597	0.387263	0.530347	0.451358	-0.0723831	27.8434	27.9865	27.9075	27.3837	27.4561
Q13263	Transcription intermediary factor 1-beta	TRIM28	TRUE	TRUE	TRUE		PD exclusive	PD exclusive	PD exclusive		NaN	NaN	NaN	NaN	NaN	NaN	NaN	NaN	24.0152	23.5494	23.3577	NaN	NaN
Q15642	Cdc42-interacting protein 4	TRIP10	TRUE	TRUE			PD exclusive	PD exclusive			NaN	NaN	NaN	NaN	NaN	NaN	NaN	NaN	24.303	24.238	NaN	NaN	NaN
Q16762	Thiosulfate sulfurtransferase	TST		TRUE				PD exclusive			NaN	NaN	NaN	NaN	NaN	NaN	NaN	NaN	NaN	24.0251	NaN	NaN	NaN
Q13630	GDP-L-fucose synthase	TSTA3	TRUE		TRUE		enriched		enriched		2.31749	1.32346	2.25853	0.0851956	0.253396	0.169891	0.0505955	-0.0946468	25.794	25.7104	25.5912	25.4459	25.5406
Q8WZ42	Titin	TTN		TRUE				PD exclusive			NaN	NaN	NaN	NaN	NaN	NaN	NaN	NaN	NaN	25.9176	NaN	NaN	NaN
P10599	Thioredoxin	TXN	TRUE				PD exclusive				NaN	NaN	NaN	NaN	NaN	NaN	NaN	NaN	23.2669	NaN	NaN	NaN	NaN
Q9BRA2	Thioredoxin domain-containing protein 17	TXNDC17	TRUE				PD exclusive				NaN	NaN	NaN	NaN	NaN	NaN	NaN	NaN	25.0462	NaN	NaN	NaN	NaN
Q16881	Thioredoxin reductase 1, cytoplasmic	TXNRD1	TRUE				enriched				2.70548	1.3658	0.32543	0.0728012	1.29374	0.220224	0.0128433	-0.392622	27.8457	26.7722	26.5648	26.1594	26.552
Q3KQV9	UDP-N-acetylhexosamine pyrophosphorylase-like protein 1	UAP1L1	TRUE				PD exclusive				NaN	NaN	NaN	NaN	NaN	NaN	NaN	NaN	23.399	NaN	NaN	NaN	NaN
P22314	Ubiquitin-like modifier-activating enzyme 1	UBA1	TRUE				enriched				3.00233	0.701681	0.487151	0.589644	0.077507	0.0477036	0.0298672	0.013121	29.2284	29.1986	29.1808	29.164	29.1509
Q8TBC4	NEDD8-activating enzyme E1 catalytic subunit	UBA3				TRUE				PD exclusive	NaN	NaN	NaN	NaN	NaN	NaN	NaN	NaN	NaN	NaN	NaN	23.0337	NaN
Q14157	Ubiquitin-associated protein 2-like	UBAP2L	TRUE	TRUE	TRUE		enriched	enriched	enriched		2.9842	4.8513	3.93821	1.75704	2.41351	4.48464	4.32241	0.869572	25.889	27.9601	27.7979	24.345	23.4755
P61081	NEDD8-conjugating enzyme Ubc12	UBE2M	TRUE				enriched				2.33186	0.080251	0.402087	0.171122	0.364027	-0.0682655	0.0541946	-0.0545416	24.5379	24.1056	24.2281	24.171	24.1739
Q13404	Ubiquitin-conjugating enzyme E2 variant 1	UBE2V1	TRUE				enriched				2.1171	0.22015	0.468999	0.267772	0.425718	-0.0271893	0.0604008	-0.0132977	26.2466	25.7937	25.8813	25.8076	25.8209
Q15386	Ubiquitin-protein ligase E3C	UBE3C	TRUE				PD exclusive				NaN	NaN	NaN	NaN	NaN	NaN	NaN	NaN	21.8062	NaN	NaN	NaN	NaN
Q9BZV1	UBX domain-containing protein 6	UBXN6	TRUE	TRUE	TRUE		PD exclusive	PD exclusive	PD exclusive		NaN	NaN	NaN	NaN	NaN	NaN	NaN	NaN	22.6062	22.9808	22.5796	NaN	NaN
O60701	UDP-glucose 6-dehydrogenase	UGDH	TRUE				enriched				3.43226	0.810692	0.19755	0.0243141	0.269582	0.0287865	-0.013974	-0.101173	30.0507	29.8099	29.7672	29.68	29.7811
P11172	Uridine 5-monophosphate synthase; Orotate phosphoribosyltransferase; Orotidine 5-phosphate decarboxylase	UMPS	TRUE				PD exclusive				NaN	NaN	NaN	NaN	NaN	NaN	NaN	NaN	22.0276	NaN	NaN	NaN	NaN
Q9H3U1	Protein unc-45 homolog A	UNC45A	TRUE				PD exclusive				NaN	NaN	NaN	NaN	NaN	NaN	NaN	NaN	21.9586	NaN	NaN	NaN	NaN
Q9UDW1	Cytochrome b-c1 complex subunit 9	UQCR10		TRUE		TRUE		PD exclusive		PD exclusive	NaN	NaN	NaN	NaN	NaN	NaN	NaN	NaN	NaN	23.0131	NaN	22.9655	NaN
Q96IX5	Up-regulated during skeletal muscle growth protein 5	USMG5	TRUE				PD exclusive				NaN	NaN	NaN	NaN	NaN	NaN	NaN	NaN	24.7487	NaN	NaN	NaN	NaN
Q93009	Ubiquitin carboxyl-terminal hydrolase 7; Ubiquitin carboxyl-terminal hydrolase	USP7	TRUE				PD exclusive				NaN	NaN	NaN	NaN	NaN	NaN	NaN	NaN	20.9687	NaN	NaN	NaN	NaN
Q08AM6	Protein VAC14 homolog	VAC14	TRUE				PD exclusive				NaN	NaN	NaN	NaN	NaN	NaN	NaN	NaN	21.2607	NaN	NaN	NaN	NaN
Q15836	Vesicle-associated membrane protein 3	VAMP3	TRUE				PD exclusive				NaN	NaN	NaN	NaN	NaN	NaN	NaN	NaN	24.1891	NaN	NaN	NaN	NaN
Q9P0L0	Vesicle-associated membrane protein-associated protein A	VAPA	TRUE	TRUE	TRUE		enriched	enriched	enriched		4.10246	2.57911	2.9775	1.26278	1.80465	1.38091	1.28969	0.253558	29.9907	29.567	29.4757	28.4396	28.186
O95292	Vesicle-associated membrane protein-associated protein B/C	VAPB	TRUE	TRUE	TRUE		PD exclusive	PD exclusive	PD exclusive		NaN	NaN	NaN	NaN	NaN	NaN	NaN	NaN	26.4995	24.7971	24.7655	NaN	NaN
Q6EMK4	Vasorin	VASN	TRUE	TRUE	TRUE		PD exclusive	PD exclusive	PD exclusive		NaN	NaN	NaN	NaN	NaN	NaN	NaN	NaN	24.4795	23.8076	23.9716	NaN	NaN
P50552	Vasodilator-stimulated phosphoprotein	VASP	TRUE		TRUE		enriched		enriched		3.67674	1.40444	2.71982	0.782426	1.01078	0.396844	0.428141	0.0902164	28.2514	27.6374	27.6687	27.3308	27.2406
Q99536	Synaptic vesicle membrane protein VAT-1 homolog	VAT1	TRUE				enriched				2.1038	0.0218411	0.1903	0.106775	0.311961	-0.0916599	-0.0315796	-0.0492523	29.8257	29.422	29.4821	29.4644	29.5137
Q709C8	Vacuolar protein sorting-associated protein 13C	VPS13C		TRUE				PD exclusive			NaN	NaN	NaN	NaN	NaN	NaN	NaN	NaN	NaN	24.1695	NaN	NaN	NaN
Q9P253	Vacuolar protein sorting-associated protein 18 homolog	VPS18	TRUE				PD exclusive				NaN	NaN	NaN	NaN	NaN	NaN	NaN	NaN	21.7838	NaN	NaN	NaN	NaN
O75351	Vacuolar protein sorting-associated protein 4B	VPS4B	TRUE				enriched				2.51119	0.617798	0.574563	0.186521	0.67532	0.106142	0.113182	-0.0273815	24.9767	24.4075	24.4212	24.274	24.3014
Q5VIR6	Vacuolar protein sorting-associated protein 53 homolog	VPS53	TRUE				PD exclusive				NaN	NaN	NaN	NaN	NaN	NaN	NaN	NaN	22.7125	NaN	NaN	NaN	NaN
Q9NP79	Vacuolar protein sorting-associated protein VTA1 homolog	VTA1	TRUE	TRUE	TRUE		enriched	enriched	enriched		3.81033	2.14907	2.14443	1.4094	3.48183	0.936337	1.1521	0.934416	26.9556	24.4102	24.6259	24.4289	23.4738
Q9UEU0	Vesicle transport through interaction with t-SNAREs homolog 1B	VTI1B	TRUE				PD exclusive				NaN	NaN	NaN	NaN	NaN	NaN	NaN	NaN	25.0648	NaN	NaN	NaN	NaN
O00401	Neural Wiskott-Aldrich syndrome protein	WASL	TRUE	TRUE			PD exclusive	PD exclusive			NaN	NaN	NaN	NaN	NaN	NaN	NaN	NaN	24.5536	24.498	NaN	NaN	NaN
O76024	Wolframin	WFS1	TRUE				PD exclusive				NaN	NaN	NaN	NaN	NaN	NaN	NaN	NaN	22.7807	NaN	NaN	NaN	NaN
O14980	Exportin-1	XPO1	TRUE				enriched				2.77502	0.71654	0.212118	0.0205759	0.56671	0.0737137	-0.0172707	-0.270241	25.5957	25.1027	25.0117	24.7587	25.029
P54577	Tyrosine--tRNA ligase, cytoplasmic; Tyrosine--tRNA ligase, cytoplasmic, N-terminally processed; Tyrosine--tRNA ligase	YARS	TRUE				enriched				2.73725	0.34651	0.381251	0.203746	0.877033	0.0152771	0.0342197	-0.047118	29.3916	28.5299	28.5488	28.4675	28.5146
O95070	Protein YIF1A	YIF1A				TRUE				enriched	0.239765	0.242794	0.178844	2.32505	-0.066422	-0.0345711	-0.0439896	0.220765	24.69	24.7924	24.783	25.1407	24.827
Q9BYJ9; Q7Z739; Q9Y5A9	YTH domain-containing family protein 1; YTH domain-containing family protein 3; YTH domain-containing family protein 2	YTHDF1; YTHDF3; YTHDF2	TRUE	TRUE	TRUE		PD exclusive	PD exclusive	PD exclusive		NaN	NaN	NaN	NaN	NaN	NaN	NaN	NaN	27.1884	26.8079	26.9039	NaN	NaN
Q5VUA4	Zinc finger protein 318	ZNF318	TRUE			TRUE	PD exclusive			PD exclusive	NaN	NaN	NaN	NaN	NaN	NaN	NaN	NaN	26.8708	NaN	NaN	27.2968	NaN
